# Supplementary material for: Pan-cancer evaluation of gene expression and somatic alteration data for cancer prognosis prediction
Source: Springer Nature journal article supplement (doi:10.1186/s12885-021-08796-3), 2021-09-25

# Pan-cancer evaluation of gene expression and somatic alteration data for cancer prognosis prediction

Xingyu Zheng, Christopher I. Amos, H. Robert Frost

## List of Contents:

### List of Tables ..... 2

X1 The full list of 33 cohorts analyzed in this study and some clinical characteristics. .... 2

### List of Figures ..... 4

|    |                                                                               |    |
|----|-------------------------------------------------------------------------------|----|
| S1 | Comparative results of gene filtering. ....                                   | 4  |
| S2 | Comparative results of integration models with filtering or Group Lasso. .... | 6  |
| S3 | Comparative results of adjusting clinical stage in the model. ....            | 8  |
| S4 | Proportions of variable selection in the integration models. ....             | 10 |
| S5 | Comparative results for Disease Free Interval outcome. ....                   | 12 |
| S6 | Comparative results for methylation data. ....                                | 14 |
| S7 | Comparative results of Fleiss Kappa values. ....                              | 16 |

Table 1 The full list of 33 cohorts analyzed in this study and some clinical characteristics.

| Cohort   | Full name                              | Sample size<br>GE | Sample size<br>CNV | Sample size<br>SPM | Death rate<br>GE | Death rate<br>CNV | Death rate<br>SPM |
|----------|----------------------------------------|-------------------|--------------------|--------------------|------------------|-------------------|-------------------|
| ACC      | Adrenocortical<br>Carcinoma            | 79                | 89                 | 90                 | 0.35             | 0.36              | 0.37              |
| BLCA     | Bladder Carcinoma                      | 403               | 404                | 391                | 0.44             | 0.44              | 0.45              |
| BRCA     | Breast Cancer                          | 1080              | 1064               | 759                | 0.14             | 0.14              | 0.15              |
| CESC     | Cervical Cancer                        | 290               | 282                | 196                | 0.24             | 0.24              | 0.21              |
| COAD     | Colon Cancer                           | 275               | 428                | 210                | 0.25             | 0.22              | 0.23              |
| COADREAD | Colon and Rectal<br>Cancer             | 367               | 585                | 205                | 0.23             | 0.21              | 0.17              |
| ESCA     | Esophageal Cancer                      | 184               | 184                | 183                | 0.42             | 0.41              | 0.41              |
| GBM      | Glioblastoma                           | 152               | 570                | 277                | 0.76             | 0.81              | 0.75              |
| GBMLGG   | lower grade glioma<br>and glioblastoma | 663               | 1078               | 446                | 0.36             | 0.54              | 0.60              |
| HNSC     | Head and Neck<br>Cancer                | 517               | 519                | 507                | 0.43             | 0.42              | 0.43              |
| KICH     | Kidney Chromophobe                     | 65                | 65                 | 65                 | 0.14             | 0.14              | 0.14              |
| KIRC     | Kidney Clear Cell<br>Carcinoma         | 531               | 526                | 213                | 0.33             | 0.33              | 0.25              |
| KIRP     | Kidney Papillary Cell<br>Carcinoma     | 287               | 285                | 279                | 0.15             | 0.15              | 0.15              |
| LAML     | Acute Myeloid<br>Leukemia              | 149               | 166                | 171                | 0.62             | 0.63              | 0.62              |
| LGG      | Lower Grade Glioma                     | 511               | 508                | 511                | 0.24             | 0.25              | 0.24              |
| LIHC     | Liver Cancer                           | 365               | 364                | 199                | 0.36             | 0.35              | 0.45              |
| LUAD     | Lung<br>Adenocarcinoma                 | 502               | 503                | 477                | 0.36             | 0.36              | 0.36              |
| LUNG     | Lung Cancer                            | 996               | 997                | 338                | 0.40             | 0.40              | 0.44              |
| LUSC     | Lung Squamous Cell<br>Carcinoma        | 494               | 494                | 175                | 0.43             | 0.43              | 0.49              |
| MESO     | Mesothelioma                           | 85                | 85                 | 81                 | 0.86             | 0.86              | 0.85              |
| OV       | Ovarian Cancer                         | 303               | 564                | 141                | 0.60             | 0.59              | 0.65              |

|      |                                    |     |     |     |      |      |      |
|------|------------------------------------|-----|-----|-----|------|------|------|
| PAAD | Pancreatic Cancer                  | 177 | 183 | 183 | 0.53 | 0.55 | 0.54 |
| PCPG | Pheochromocytoma and Paraganglioma | 177 | 160 | 177 | 0.03 | 0.04 | 0.03 |
| PRAD | Prostate Cancer                    | 496 | 491 | 497 | 0.02 | 0.02 | 0.02 |
| READ | Rectal Cancer                      | 92  | 157 | 80  | 0.18 | 0.17 | 0.20 |
| SARC | Sarcoma                            | 259 | 257 | 255 | 0.38 | 0.38 | 0.38 |
| STAD | Stomach Cancer                     | 103 | 413 | 355 | 0.28 | 0.40 | 0.37 |
| TGCT | Testicular Cancer                  | 387 | 134 | 134 | 0.40 | 0.03 | 0.03 |
| THCA | Thyroid Cancer                     | 134 | 498 | 495 | 0.03 | 0.03 | 0.03 |
| THYM | Thymoma                            | 504 | 122 | 122 | 0.03 | 0.07 | 0.07 |
| UCEC | Endometroid Cancer                 | 119 | 537 | 194 | 0.08 | 0.17 | 0.13 |
| UVM  | Ocular Melanoma                    | 174 | 80  | 80  | 0.18 | 0.29 | 0.29 |

**Figure S1 Comparative results of gene filtering using the output from a univariable Cox model for single omics models.**

‘PLv’ represents ‘pathway-level’ and ‘GLv’ represents ‘gene-level’. The dots represent the values of the concordance index and the bars represent the standard error.

‘UniCox filter’ means we restricted the genes to include only the genes that are significant genes (p-value less than 0.05) in univariable Cox models.

For PLv SPM model, filtering resulted in a model without any pathway-level predictors at the optimal Lasso penalization threshold (the relative performance for this model is therefore not included in Supplementary Figure S1).

a) Gene Level Comparison

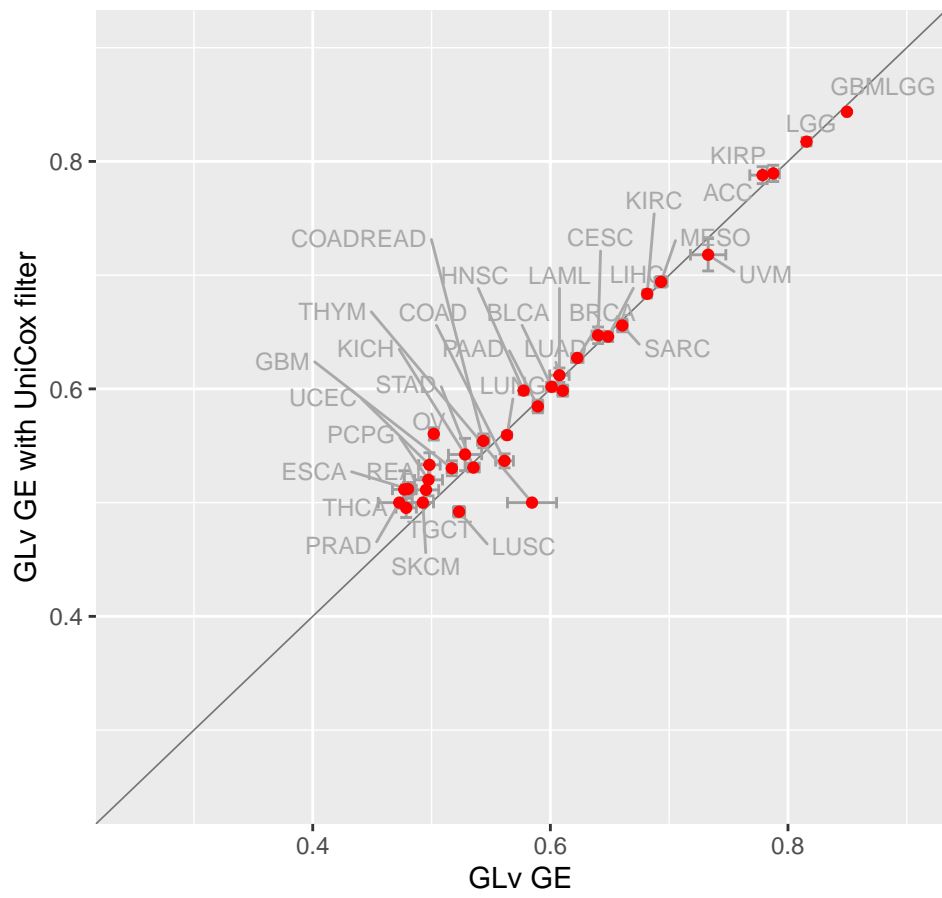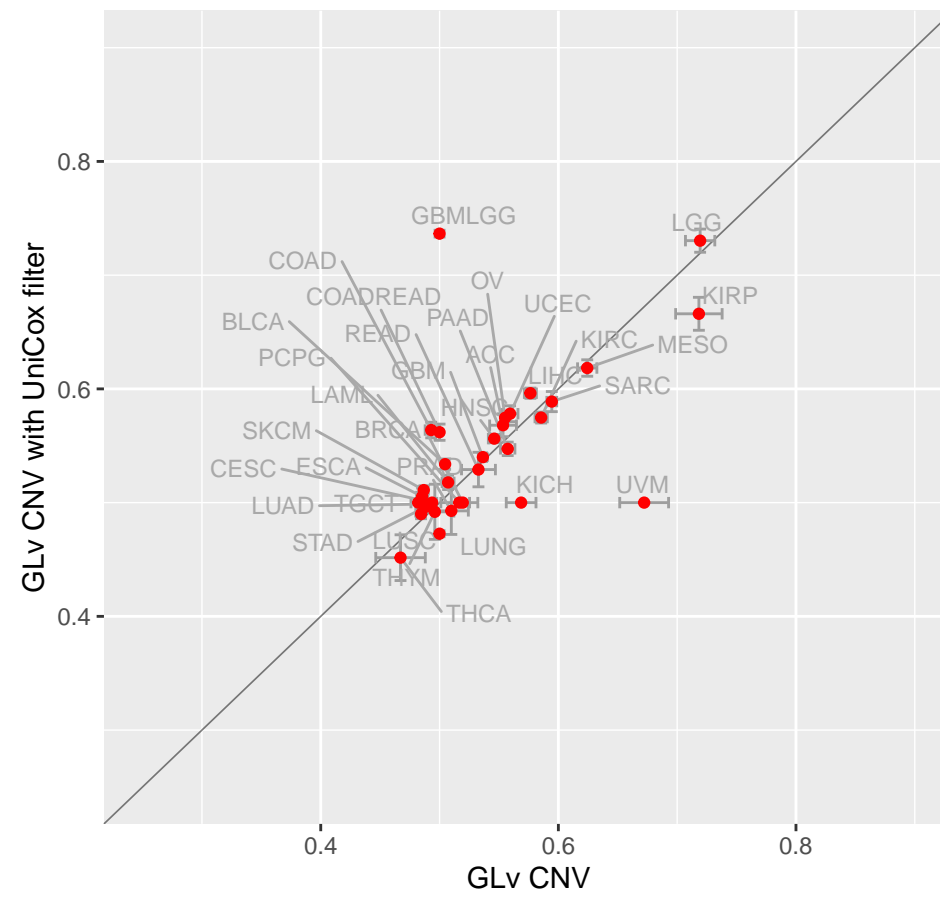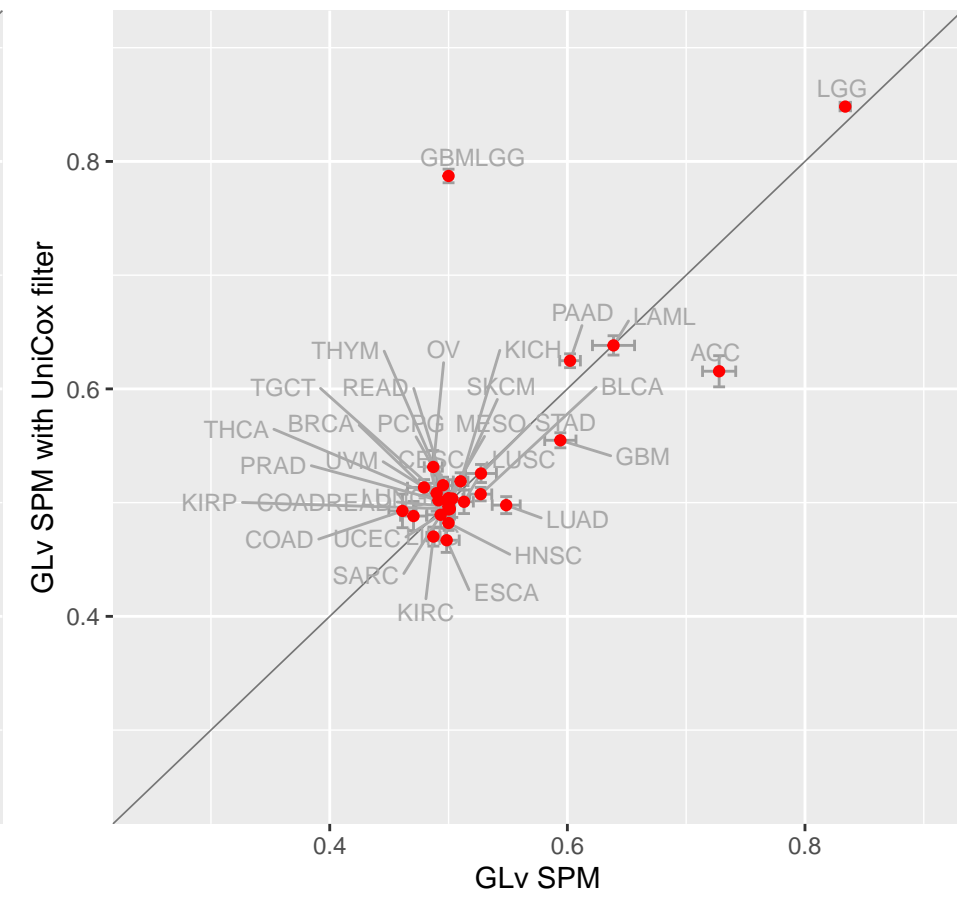

b) Pathway Level Comparison

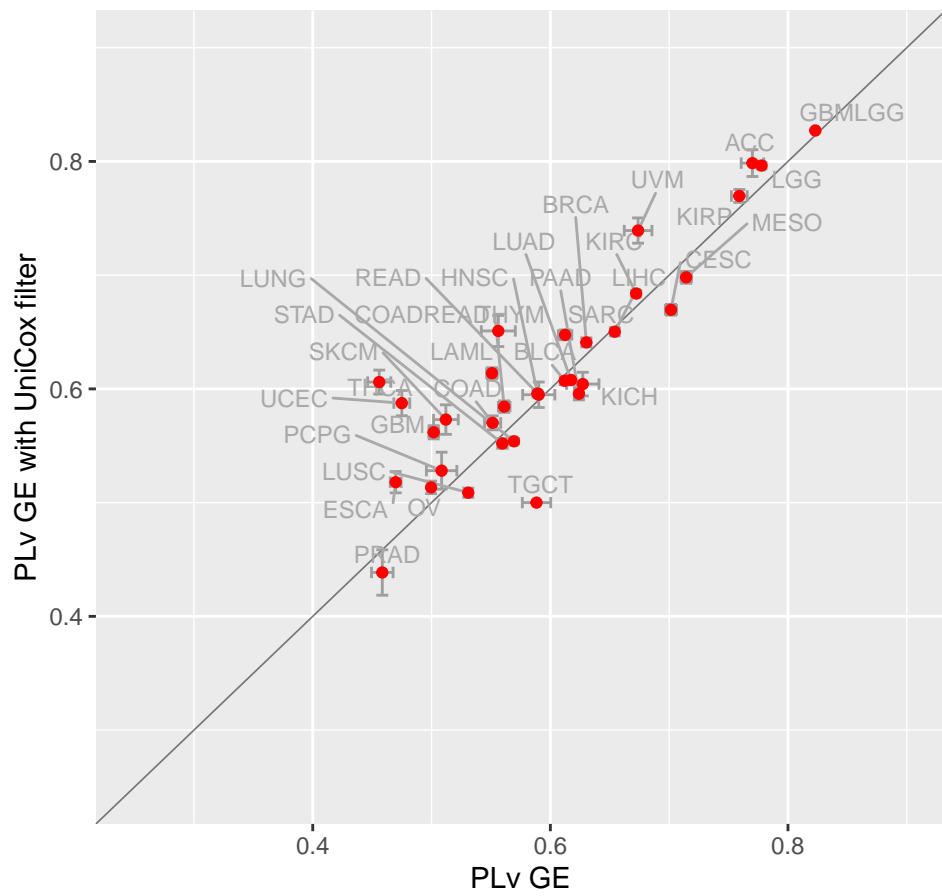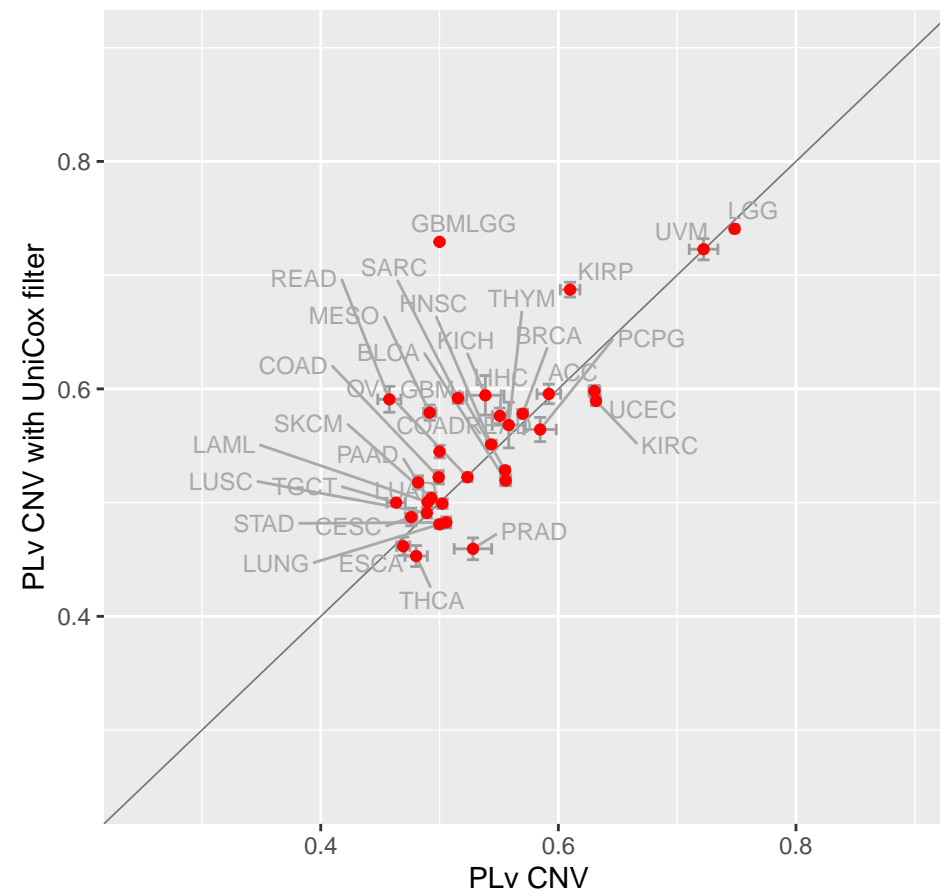

**Figure S2 Comparative results of integration models with filtering or Group Lasso.**

‘PLv’ represents ‘pathway-level’ and ‘GLv’ represents ‘gene-level’. The dots represent the values of the concordance index and the bars represent the standard error.

‘UniCox filter’ means we restricted the genes to include only the genes that are significant genes (p-value less than 0.05) in univariable Cox models.

‘Cosmic filter’ means we restricted the genes to include only the genes that are present in the Cosmic database.

For row a and b, we implemented the first integrative method as described in Methods section, which is combination. For row c, we implemented the second integrative method as described in Methods section, which is Group Lasso.

a) Filtering by uni-Cox

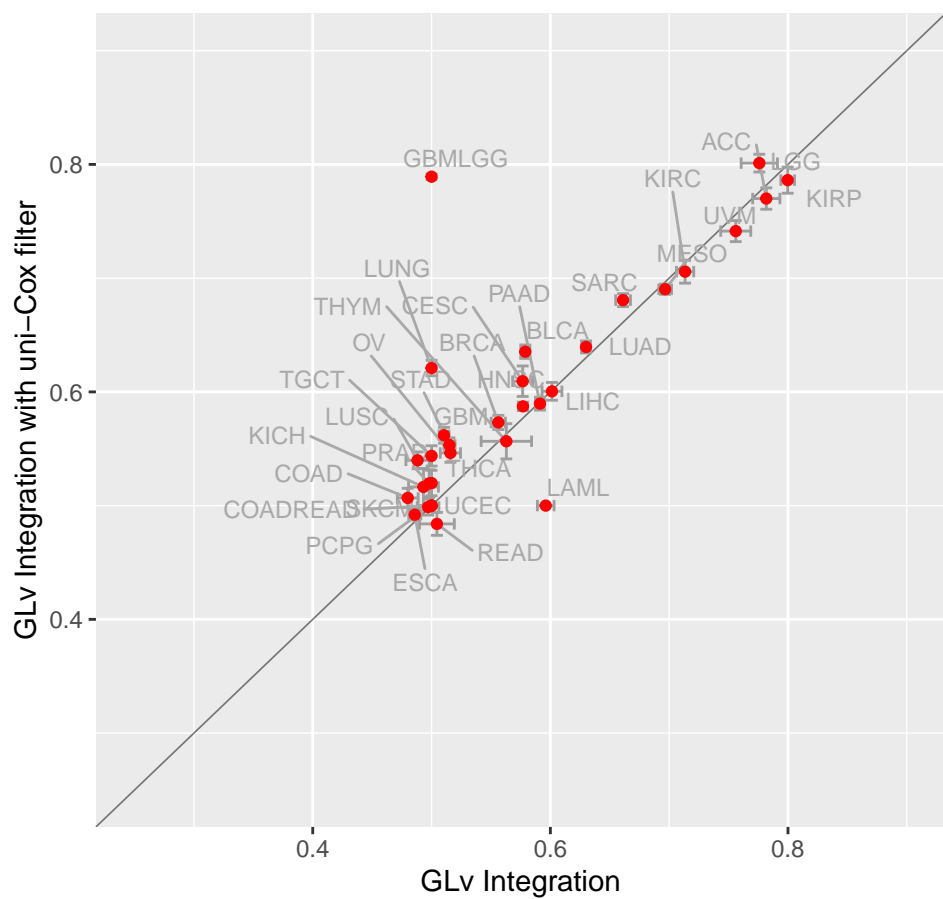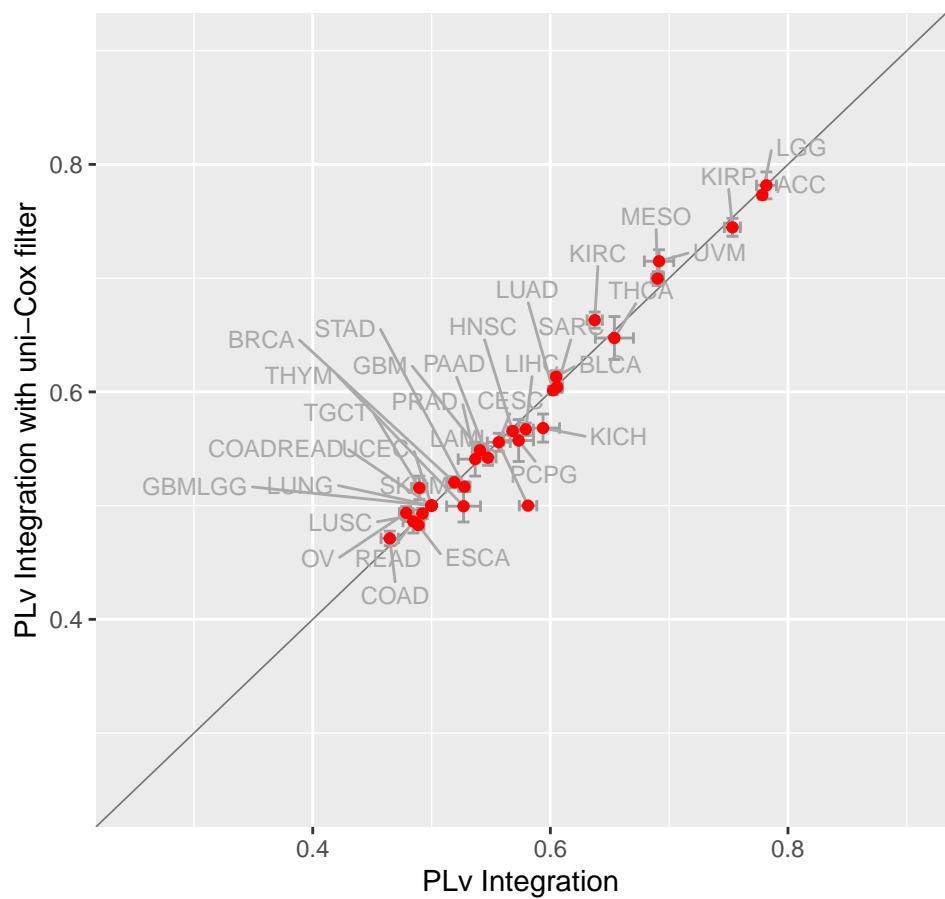

b) Filtering by Cosmic

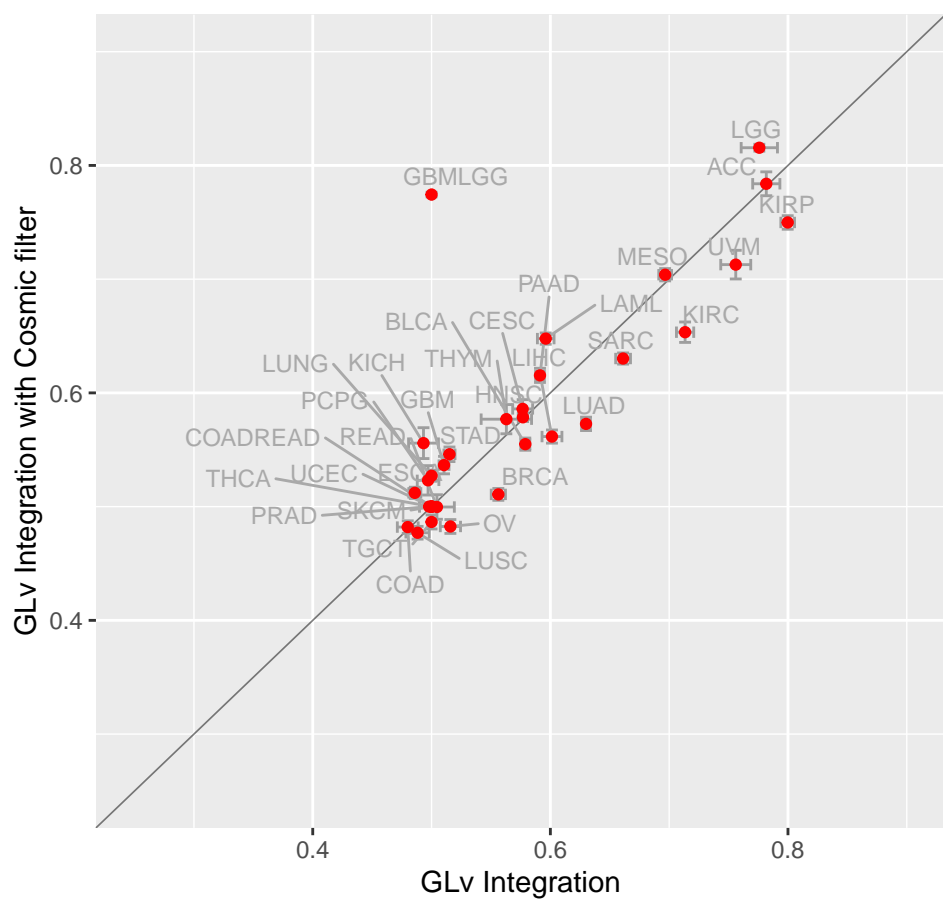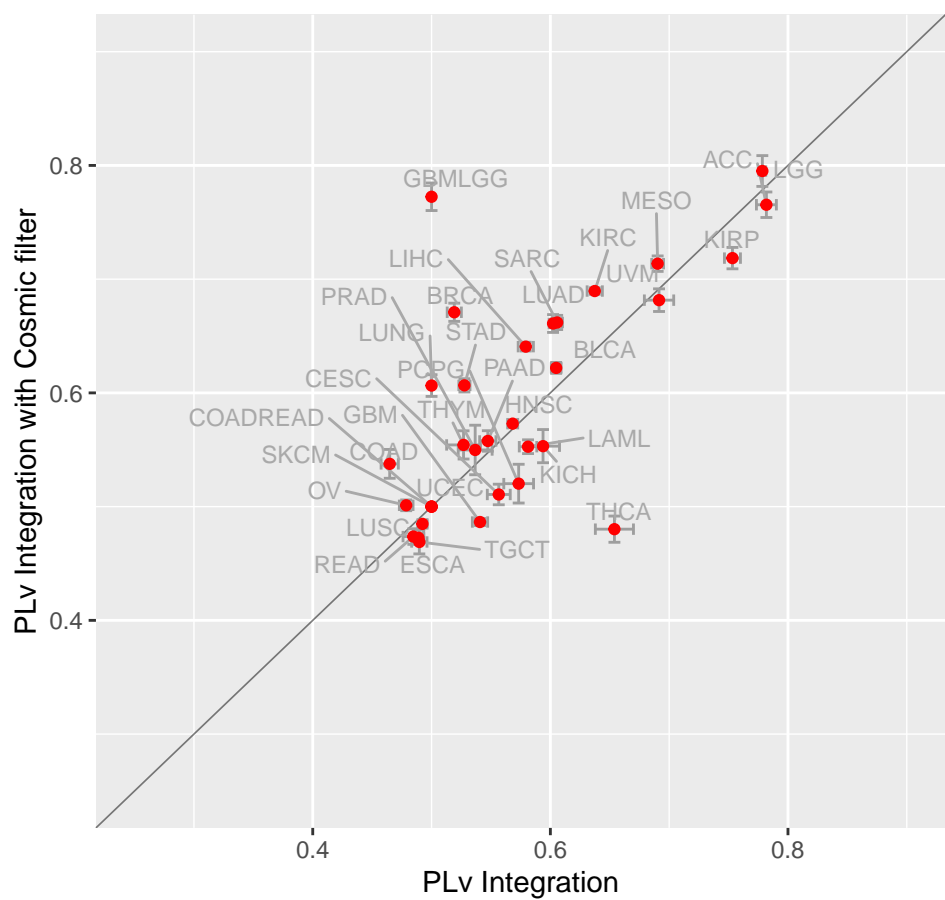

c) Integration with by Group Lasso

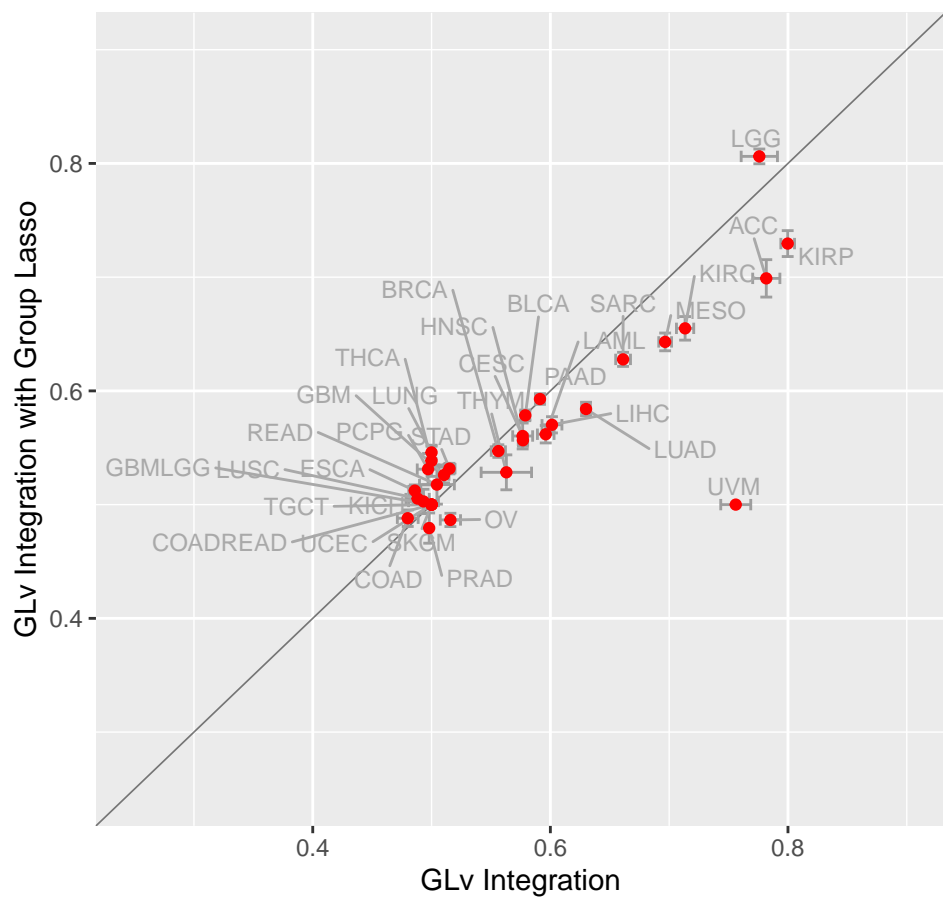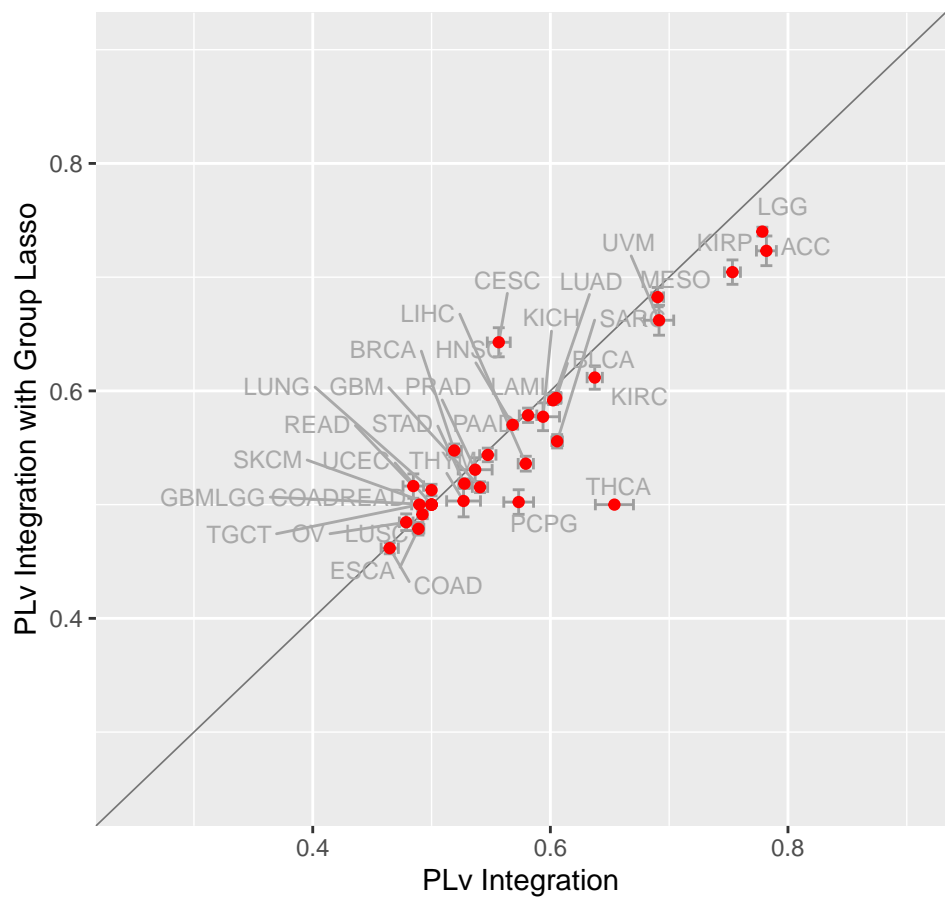

**Figure S3 Comparative results of adjusting clinical stage in the model.**

‘PLv’ represents ‘pathway-level’ and ‘GLv’ represents ‘gene-level’. The dots represent the values of the concordance index and the bars represent the standard error.

‘stage adjustment’ means that we added the adjustment of clinical stage variable in the models.

a) Gene Level Comparison

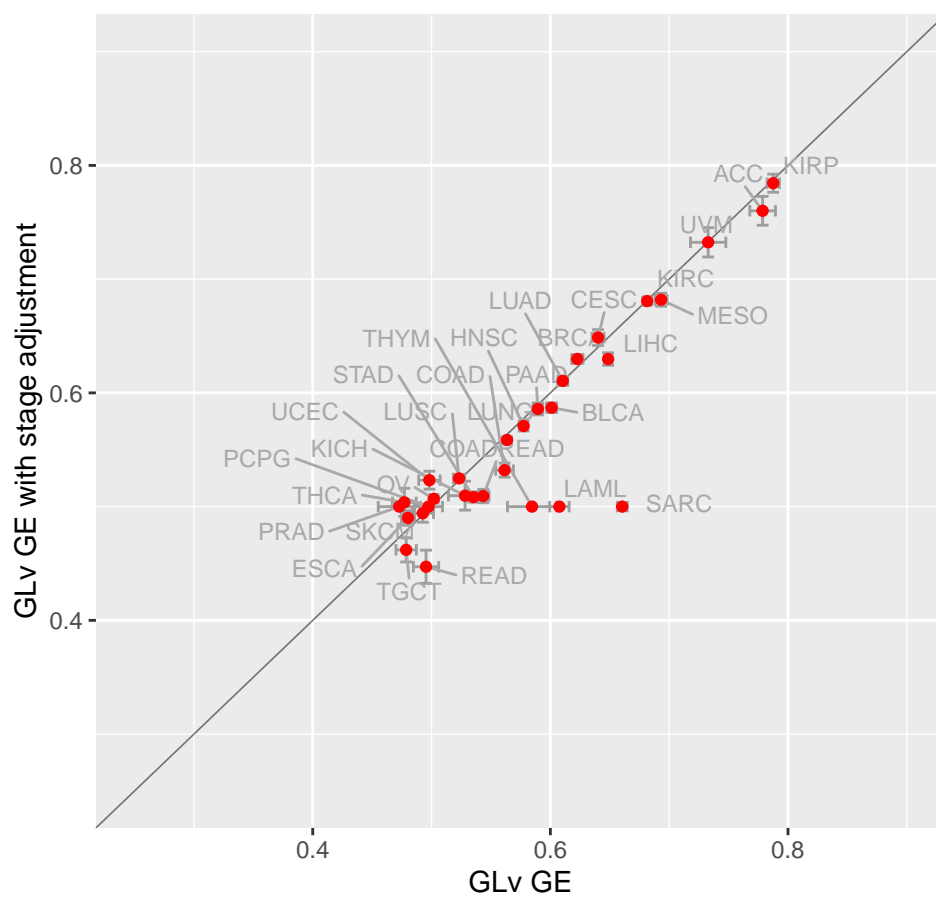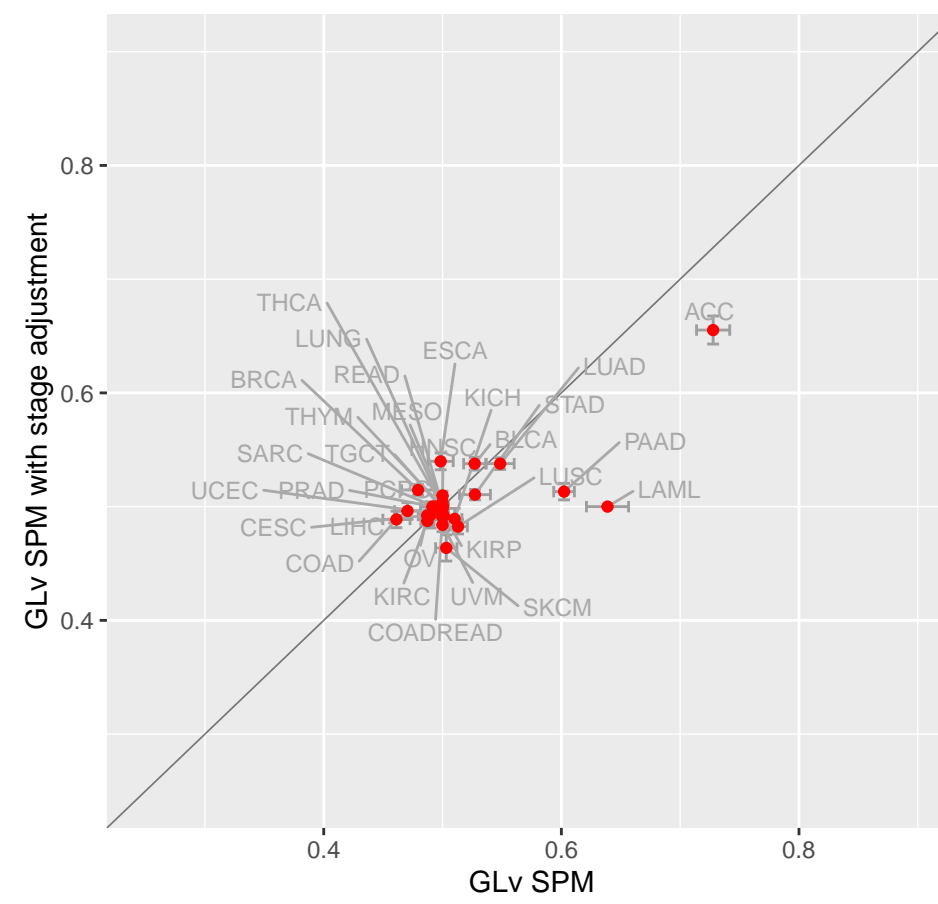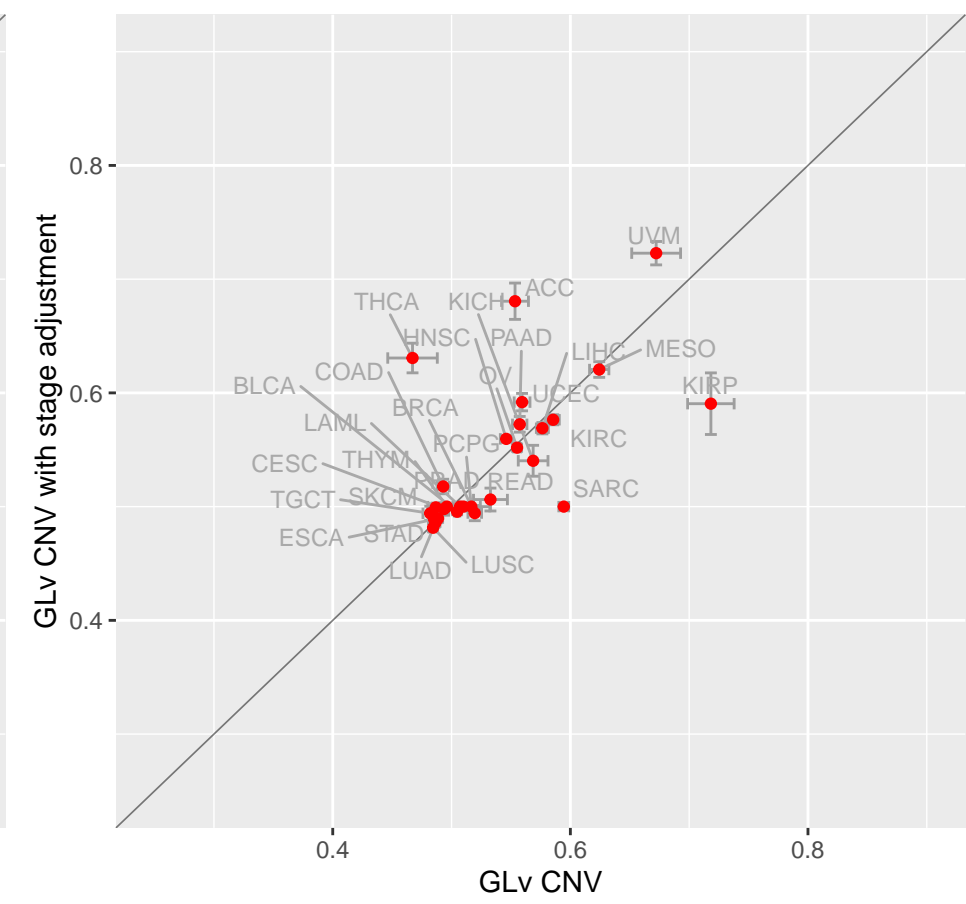

b) Pathway Level Comparison

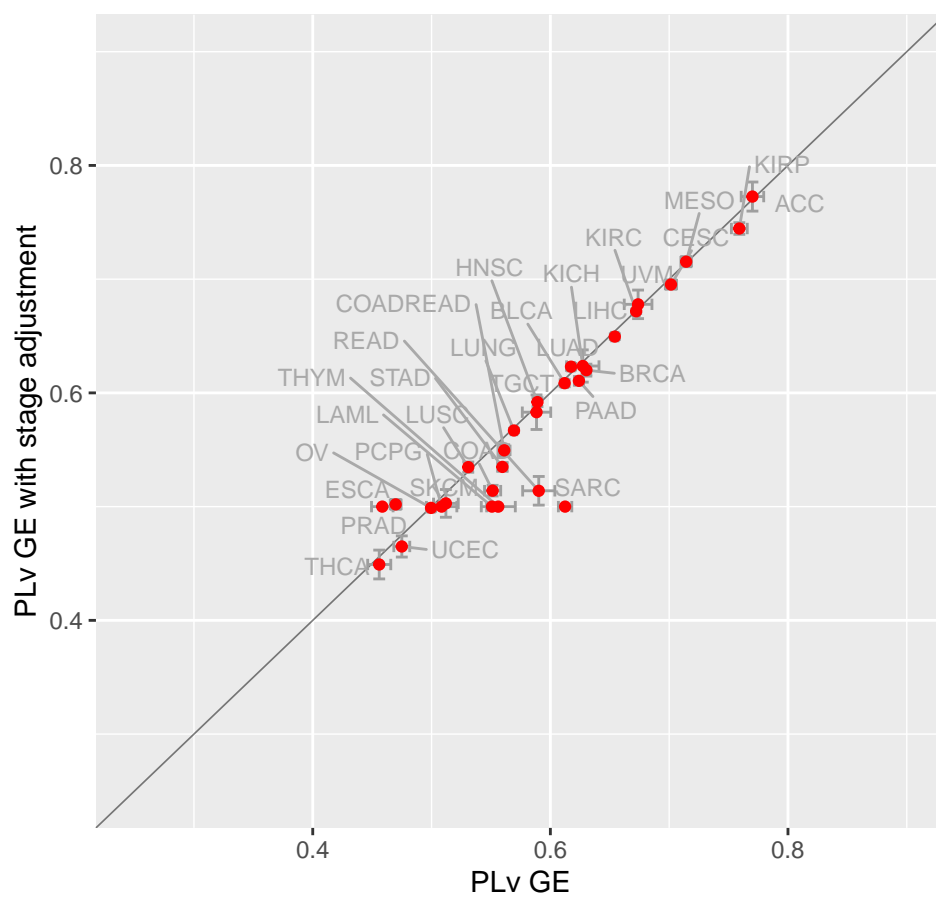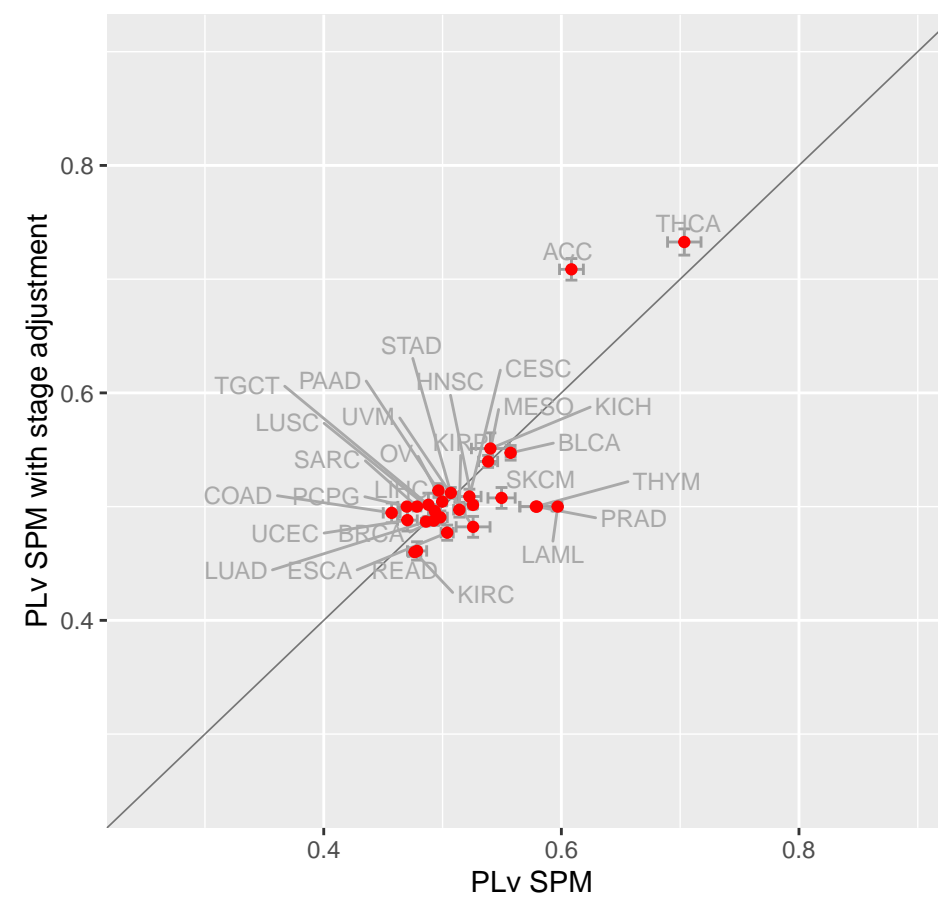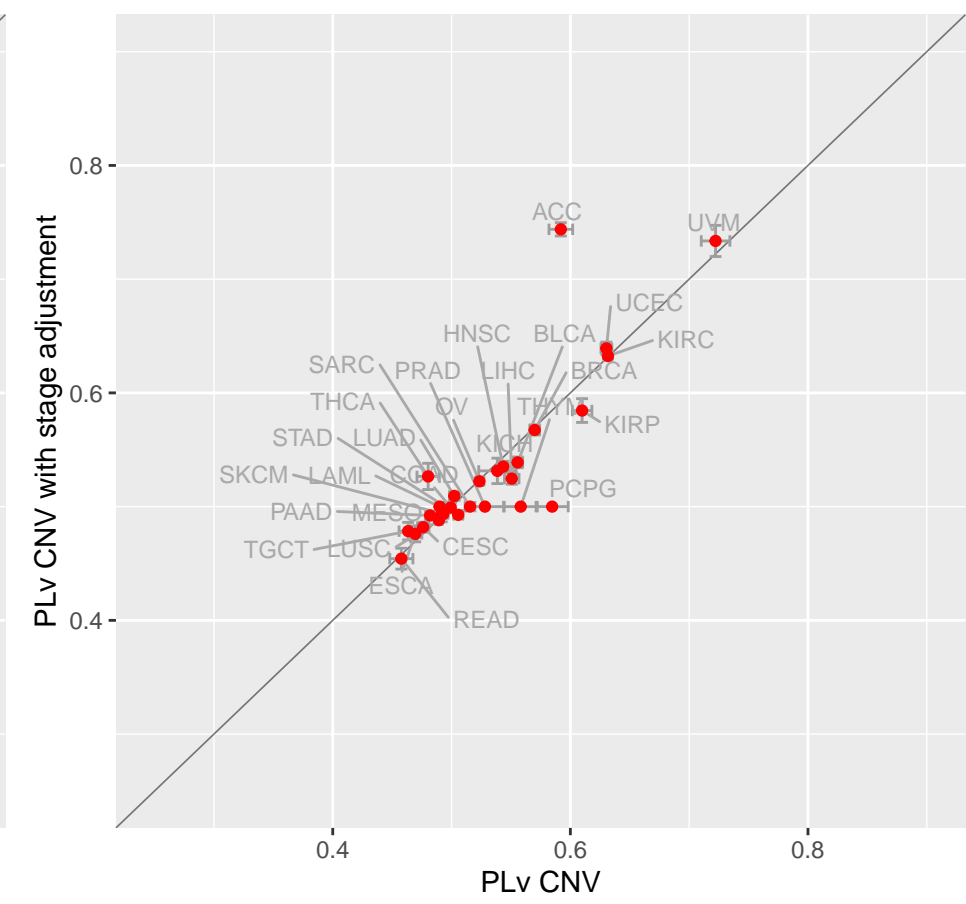

**Figure S4 Proportions of variable selection for single type of data in the integration models.**

These heatmaps display the values of the proportions of each type of variable in the integrative models (GE, CNV and SPM separately), which are between 0 and 1.

'PLv' represents 'pathway-level' and 'GLv' represents 'gene-level'.

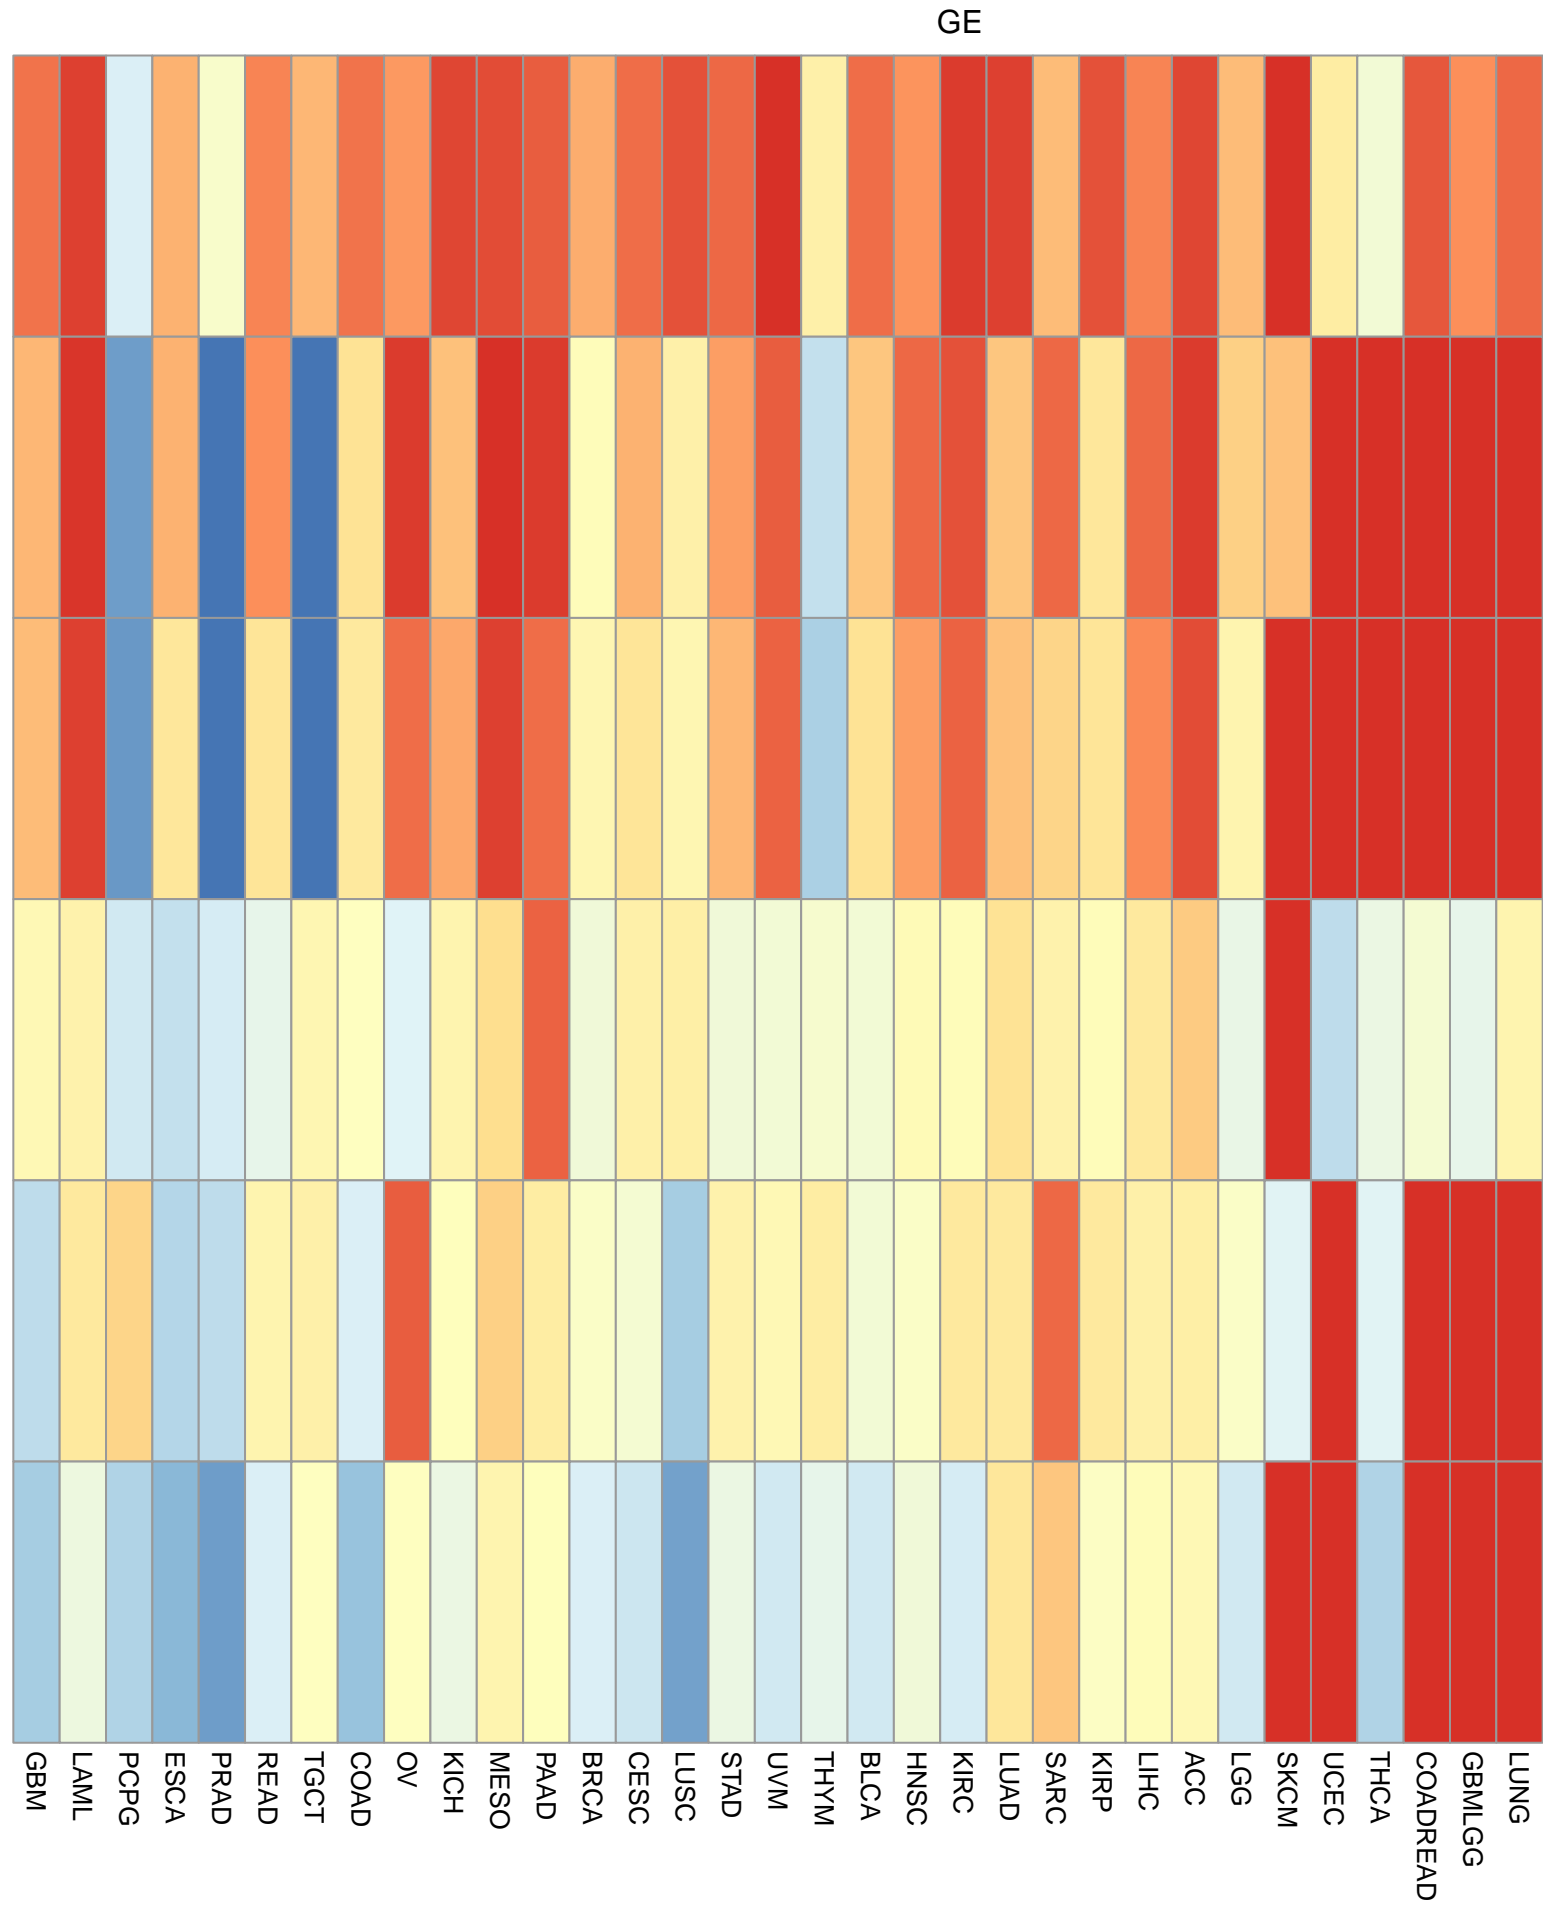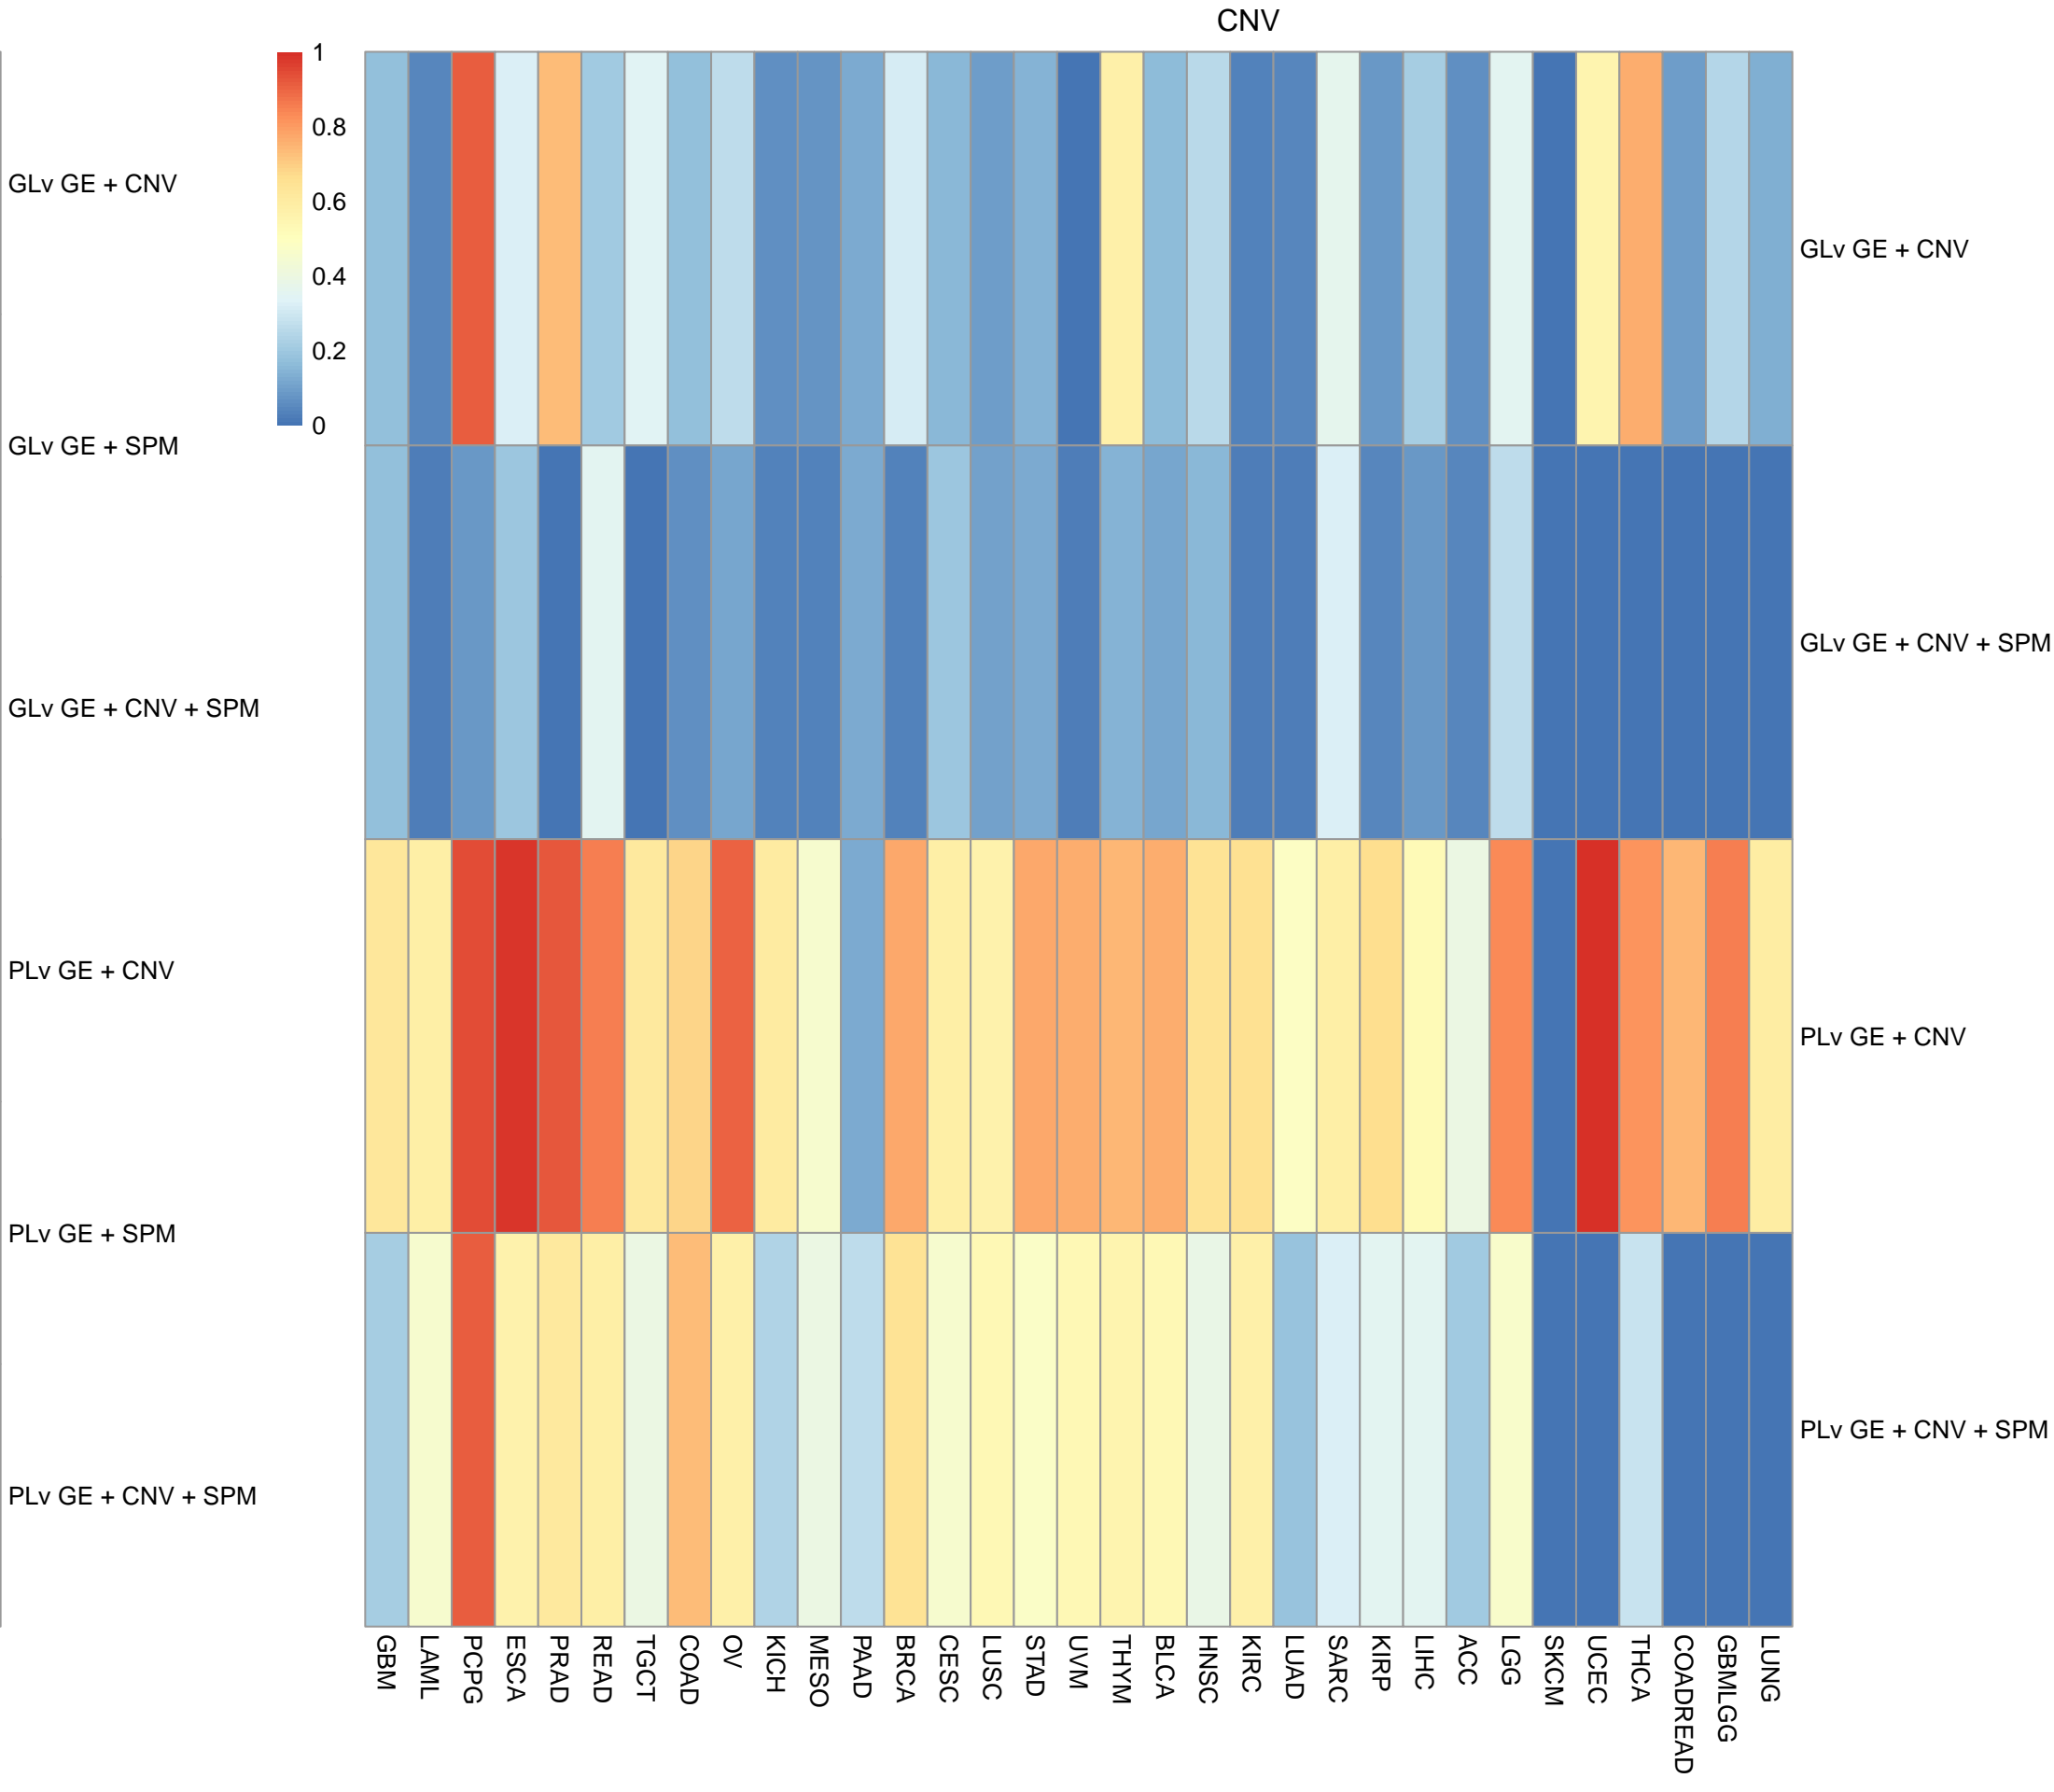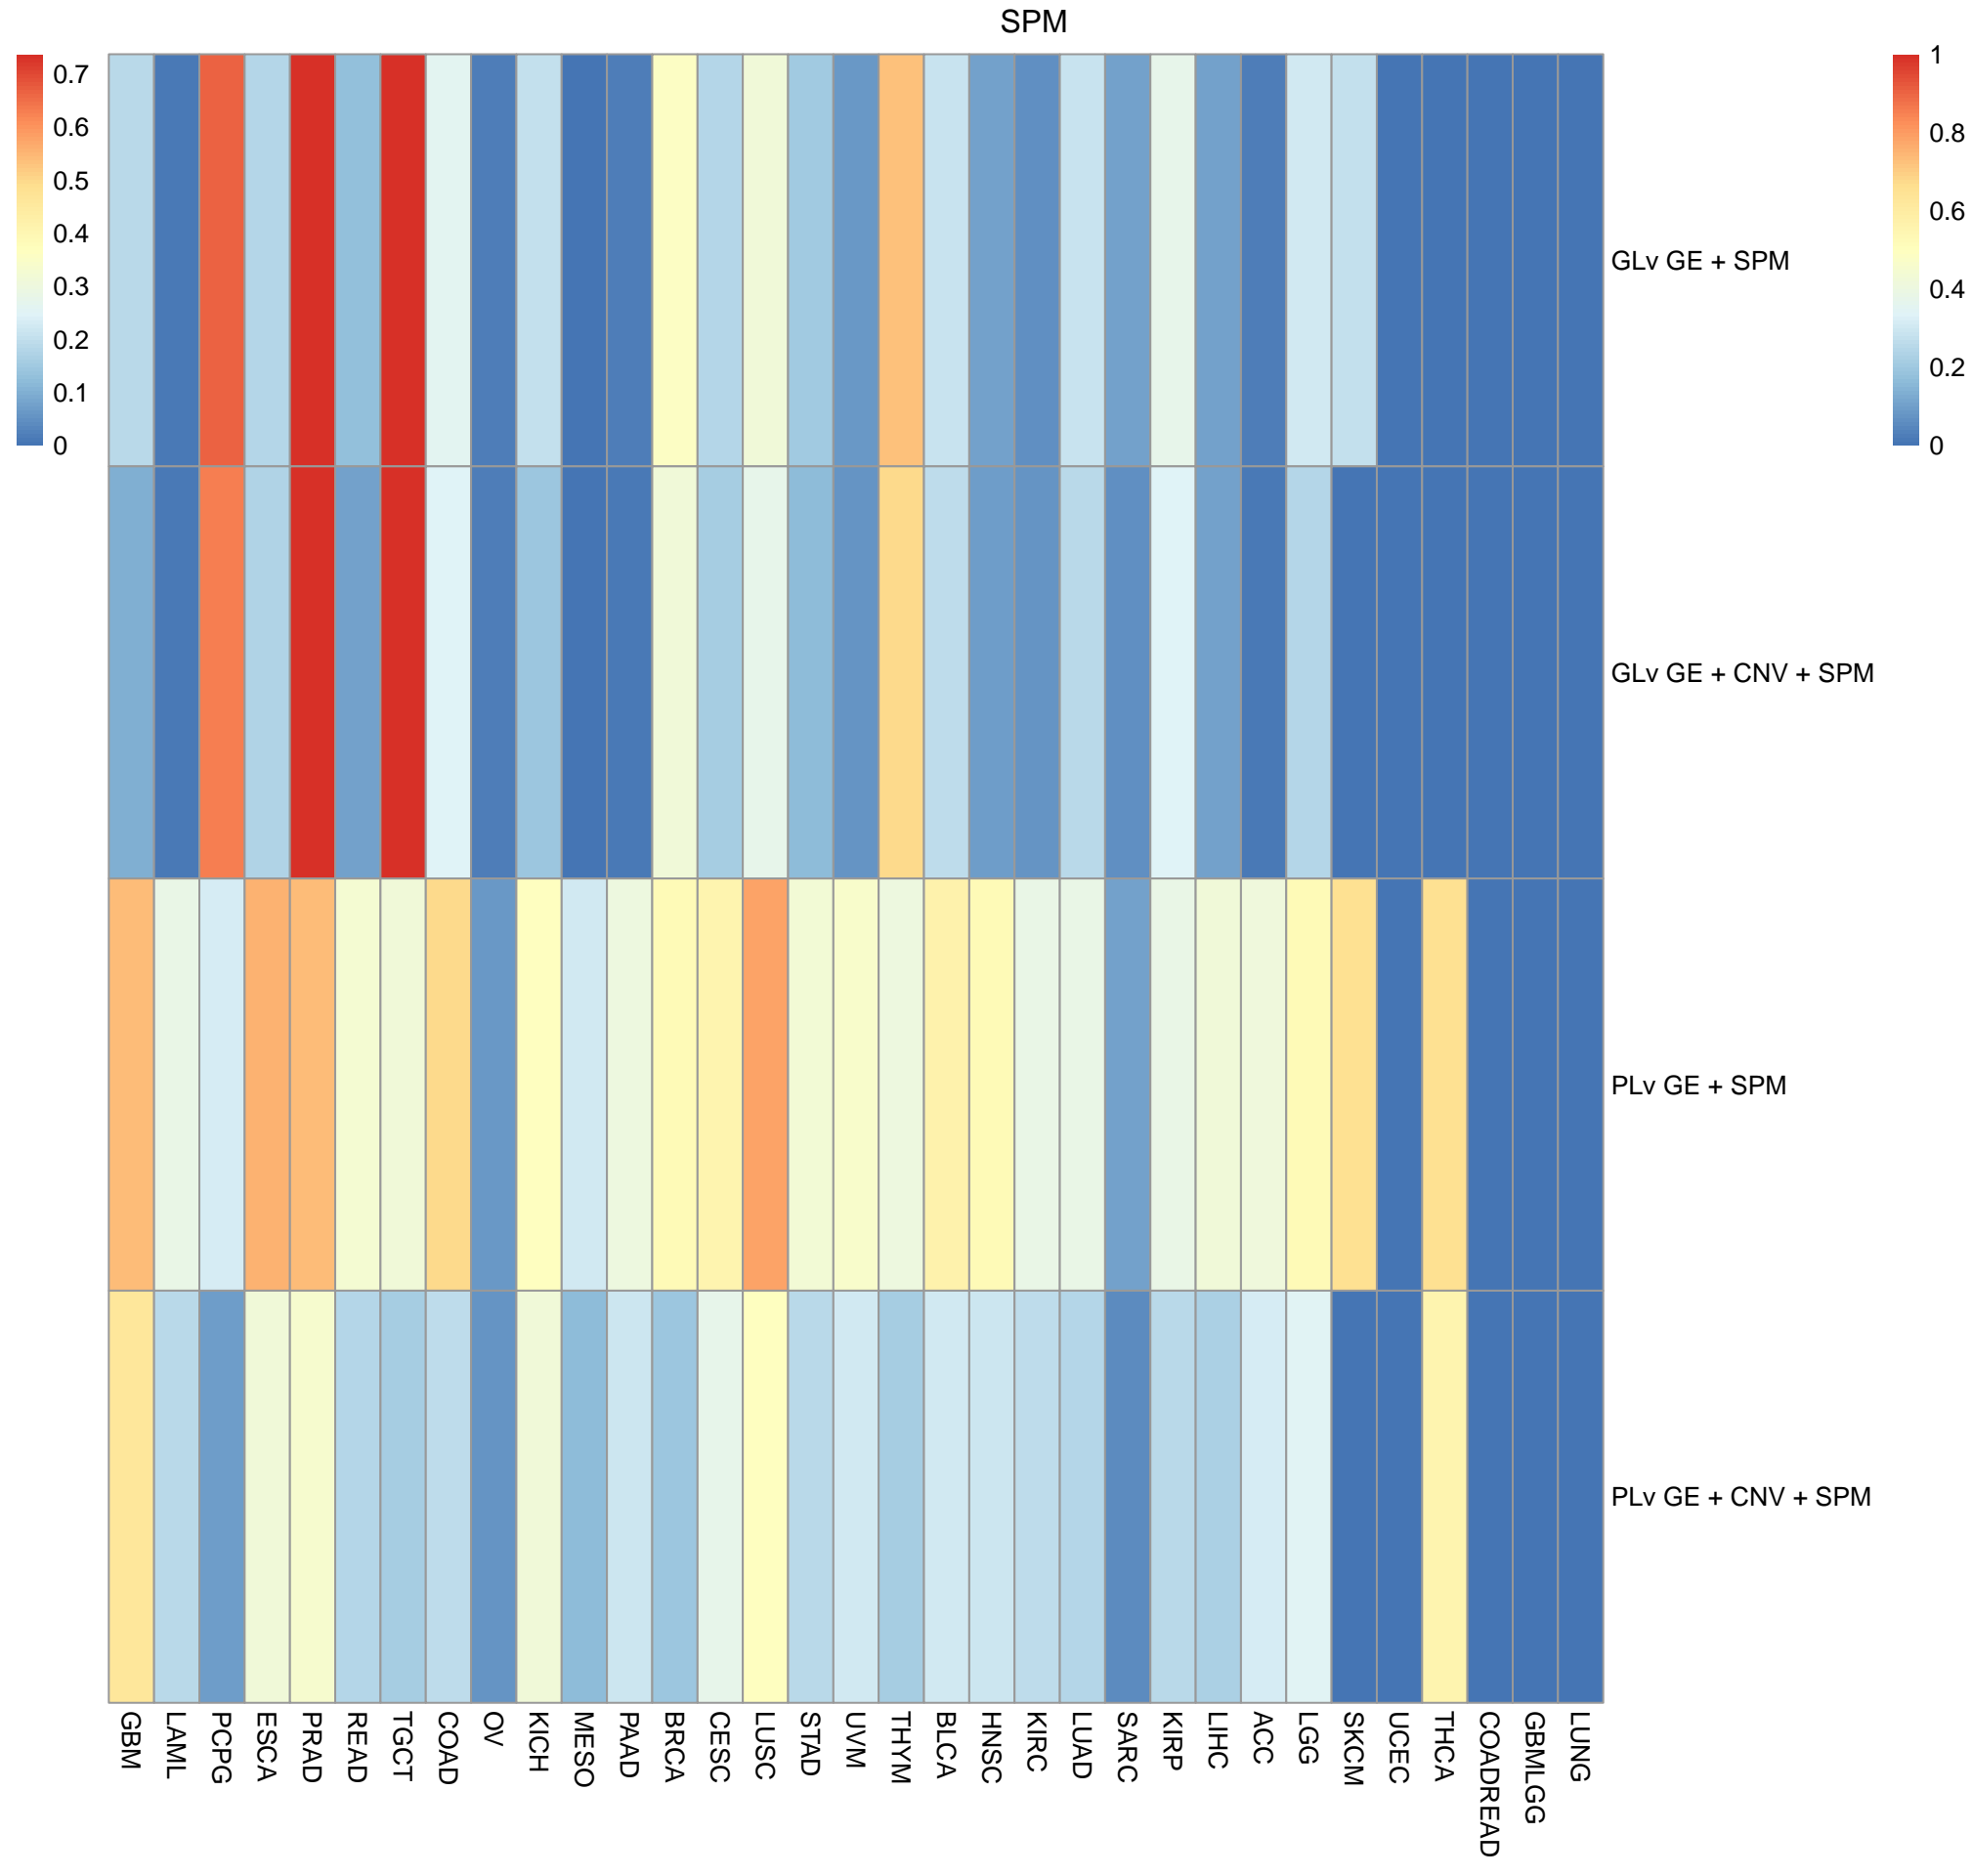

**Figure S5 Comparative results of predicting Disease Free Interval outcome for both gene-level and pathway-level prognostic models estimated using GE, SPM and CNV data from multiple cancer types.**

‘PLv’ represents ‘pathway-level’ and ‘GLv’ represents ‘gene-level’. The dots represent the values of the concordance index and the bars represent the standard error.

a) Gene Level Comparison

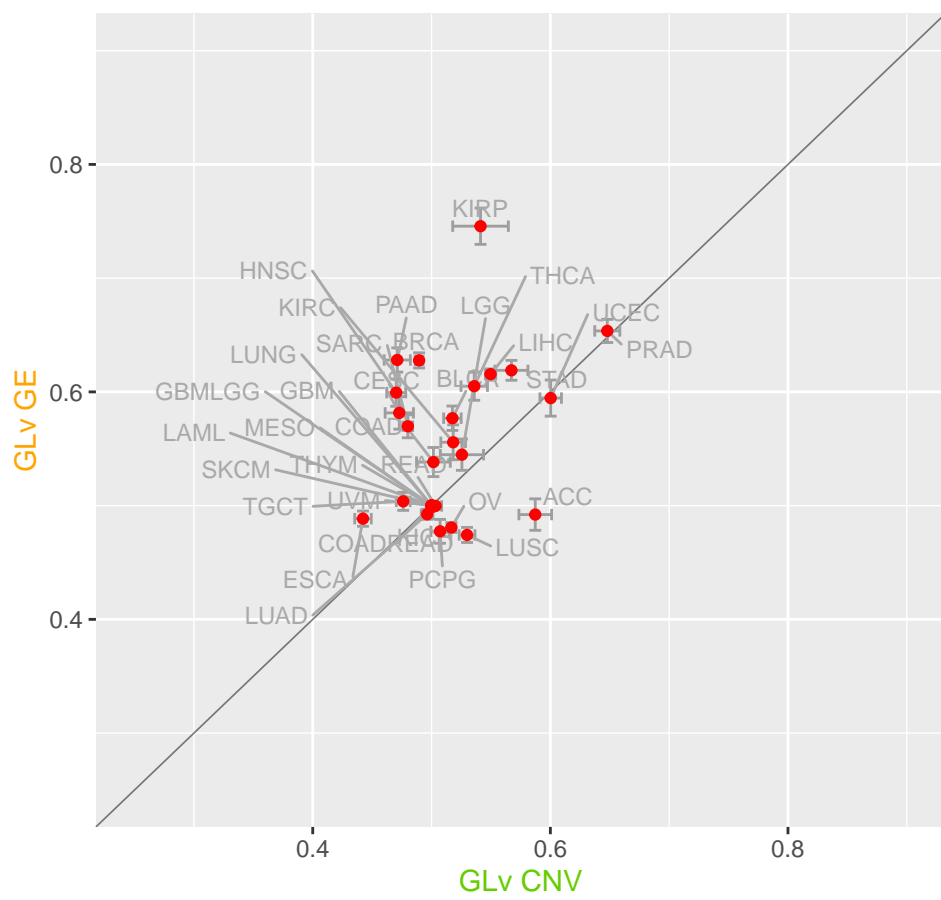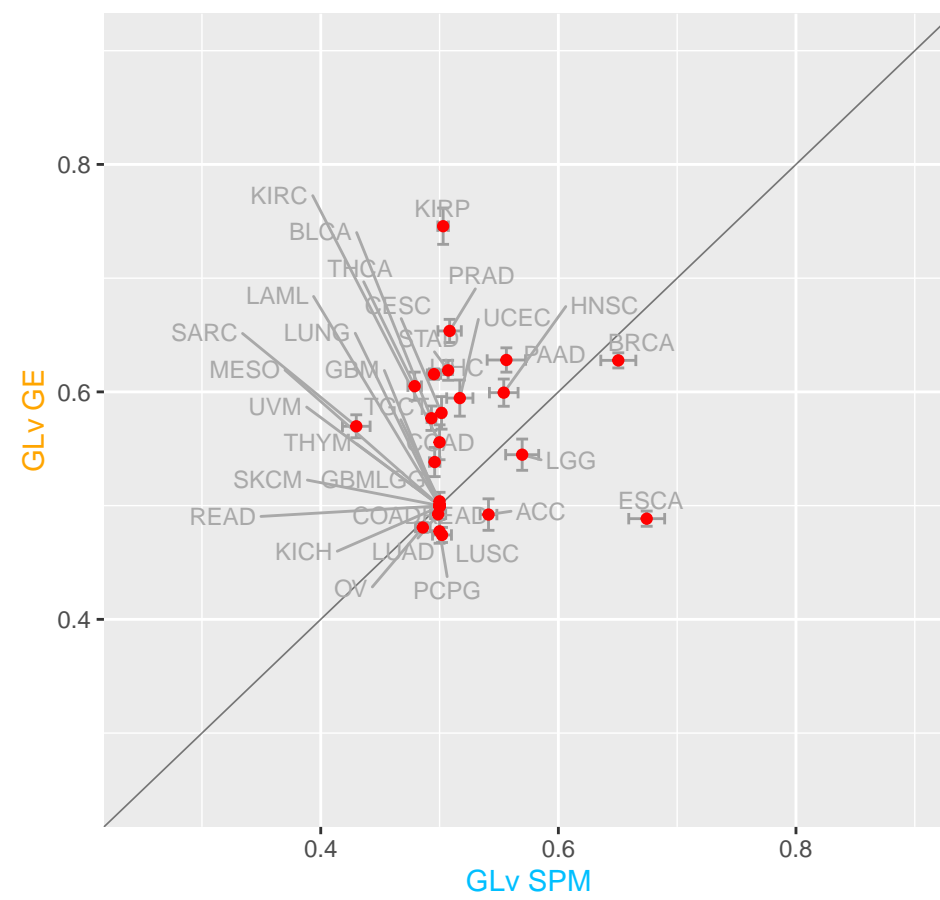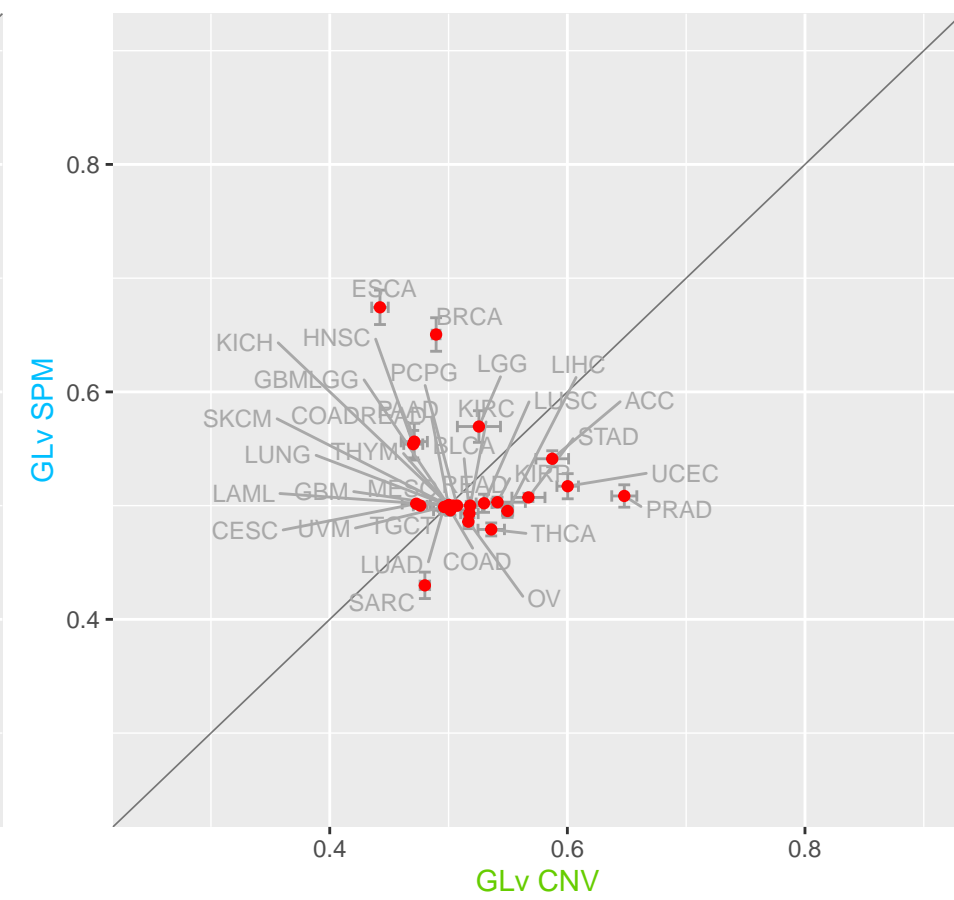

b) Pathway Level Comparison

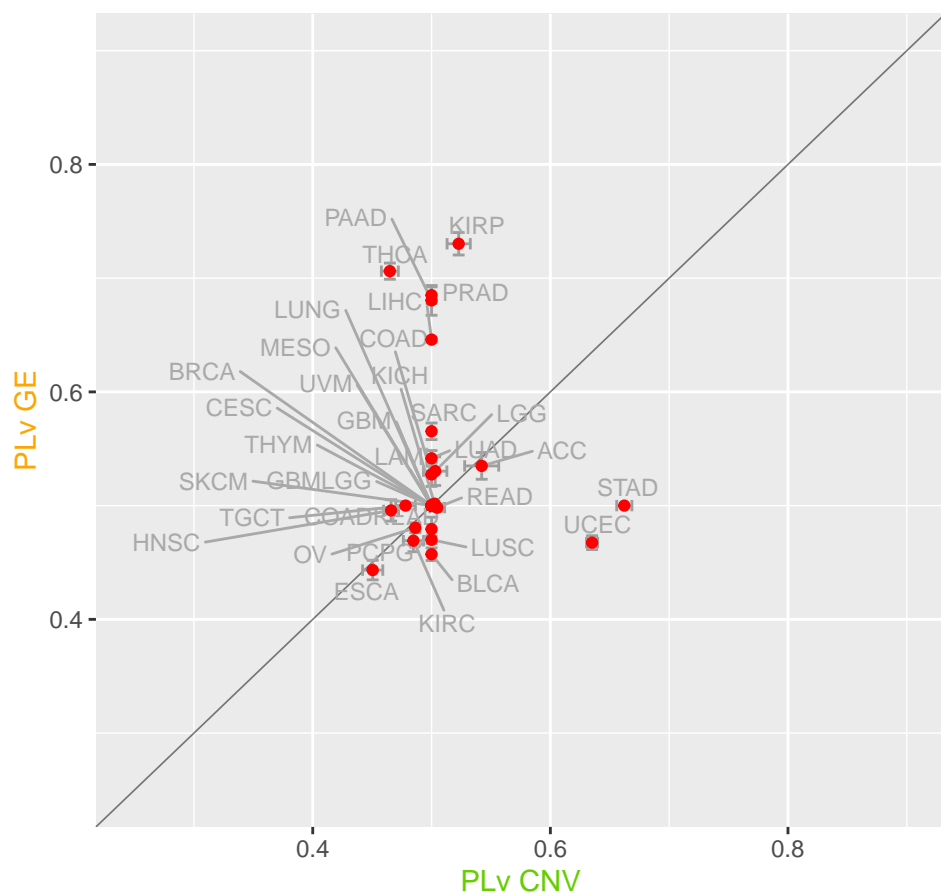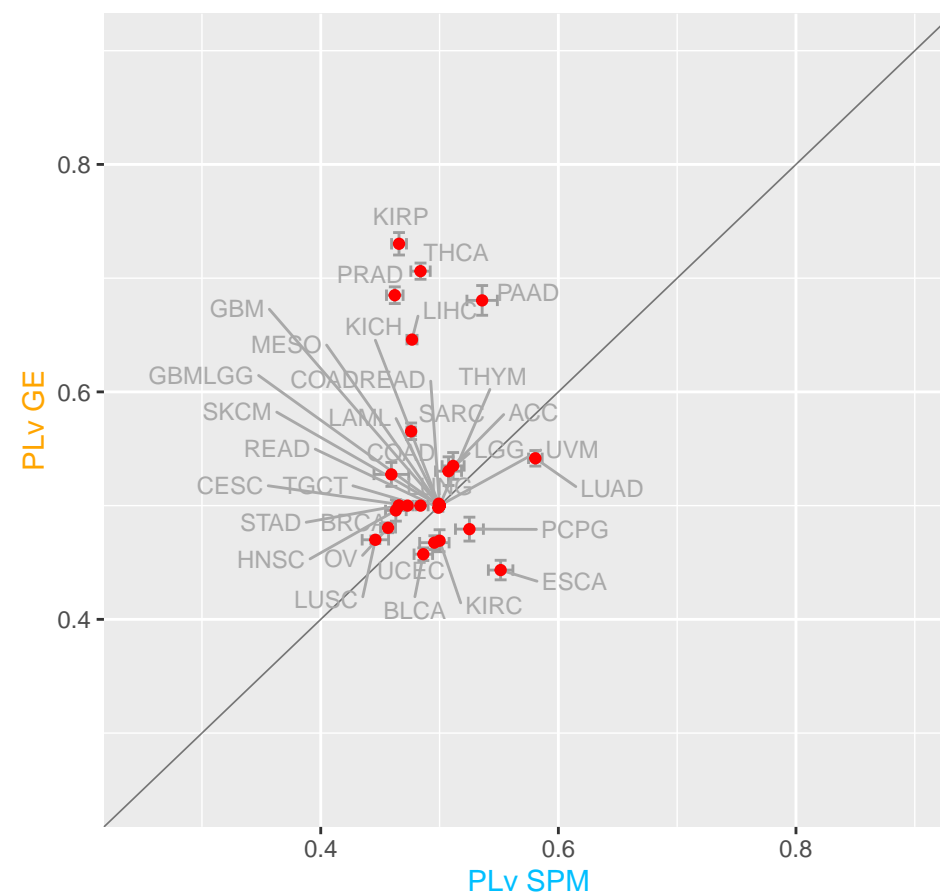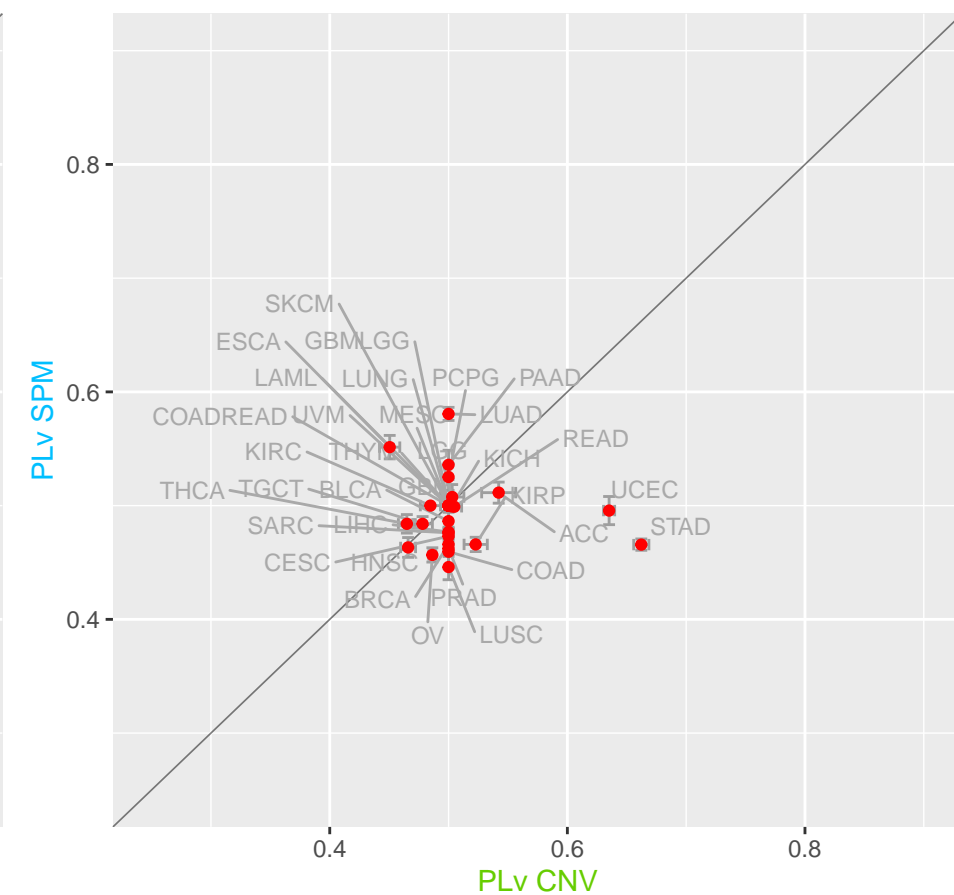

c) Gene Level versus Pathway Level

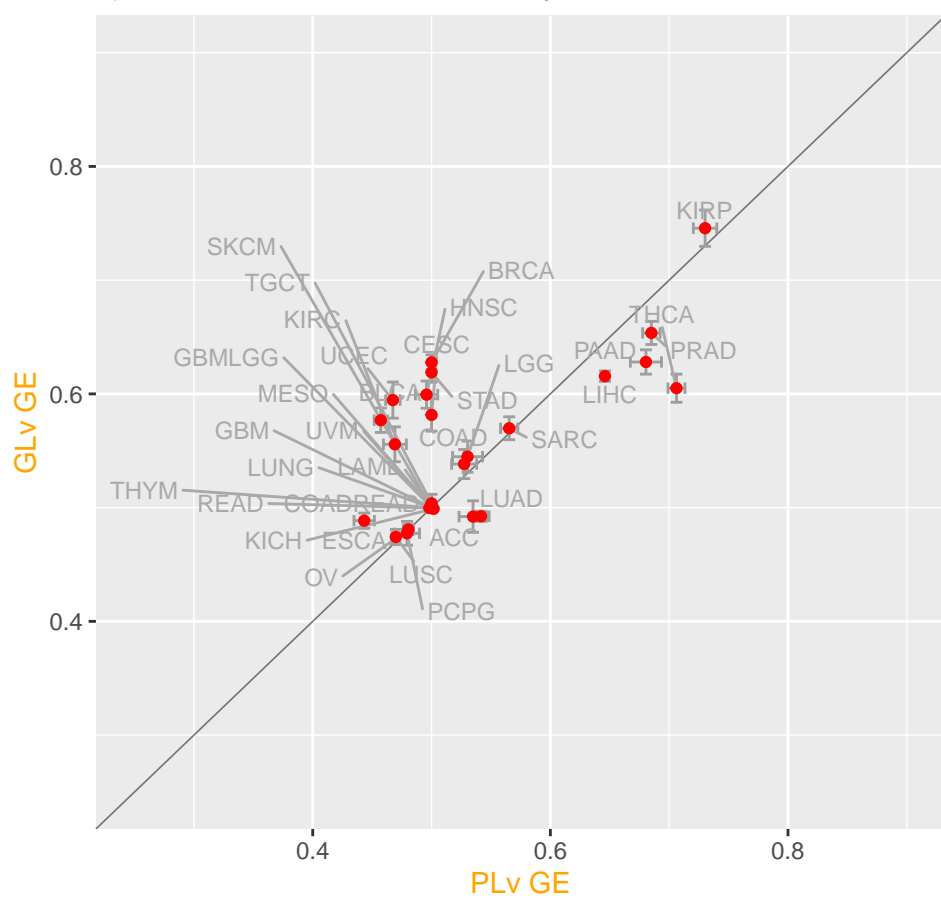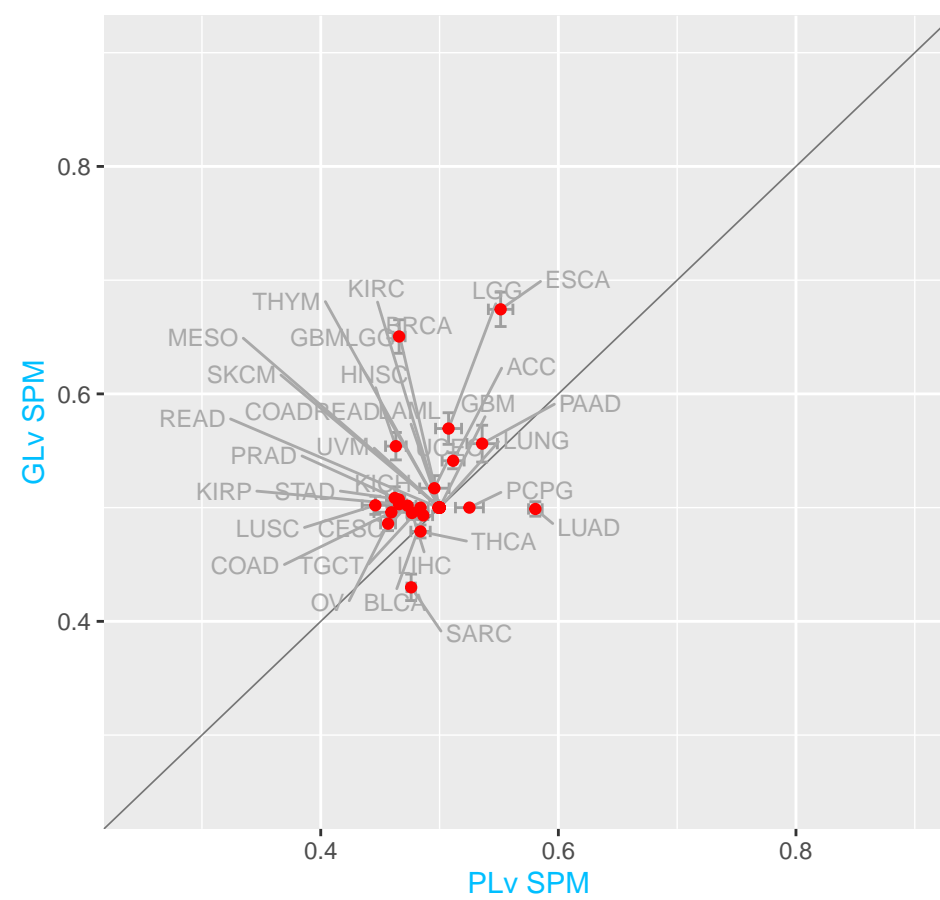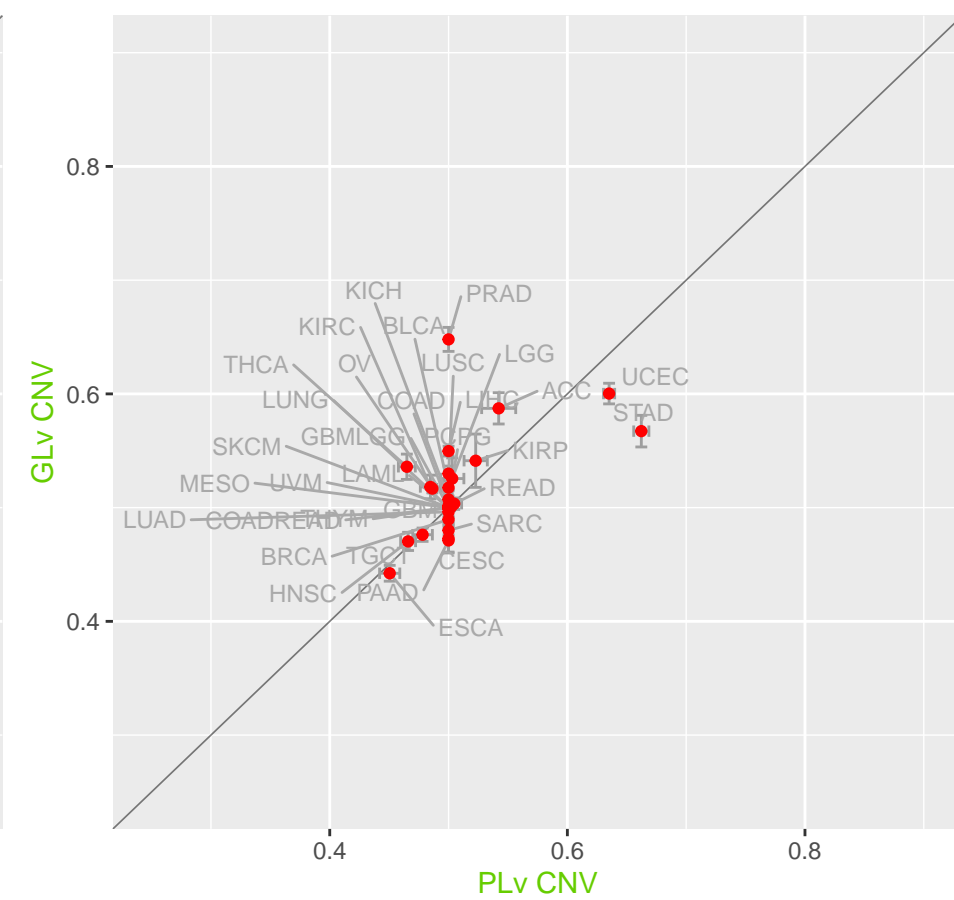

**Figure S6 Comparative results for both gene-level and pathway-level prognostic models estimated using GE, SPM, CNV and methylation data from multiple cancer types.**

‘PLv’ represents ‘pathway-level’ and ‘GLv’ represents ‘gene-level’. The dots represent the values of the concordance index and the bars represent the standard error.

### Comparison on the pathway level

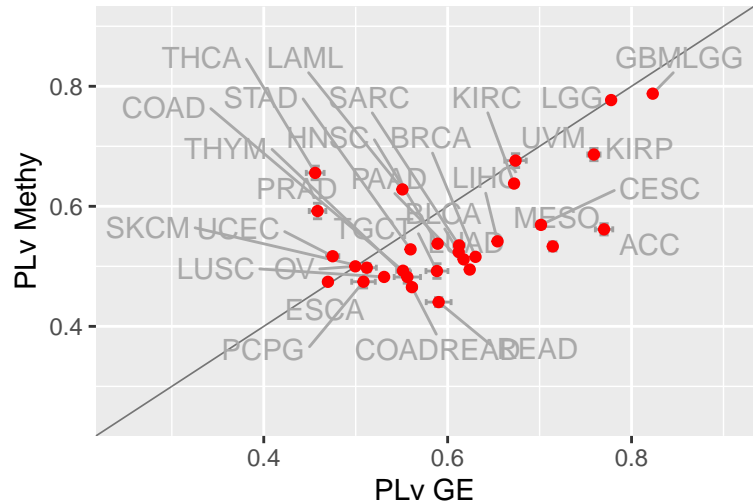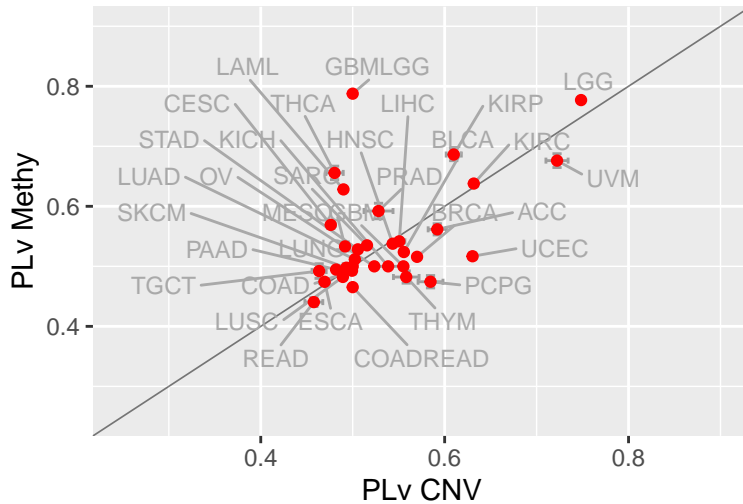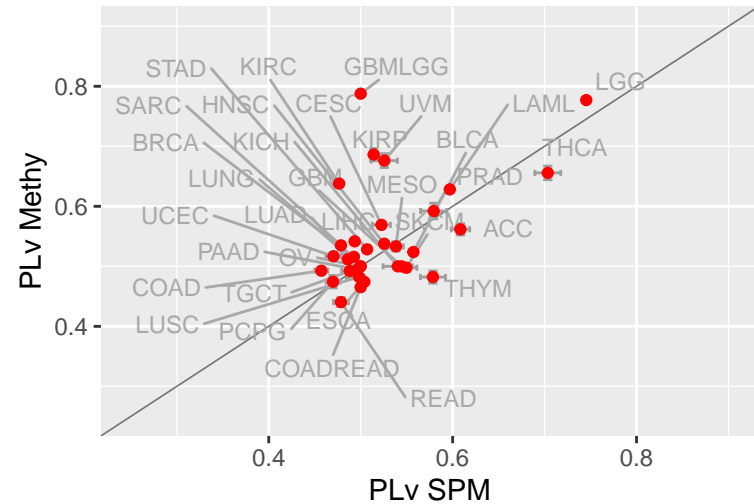

### Comparison on the gene level

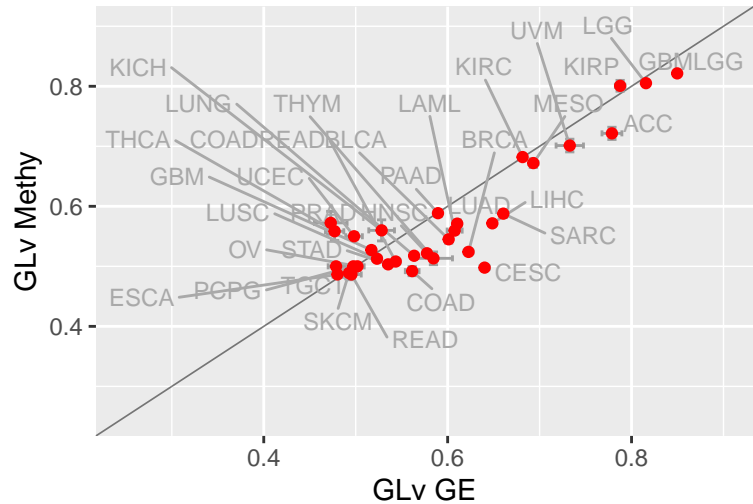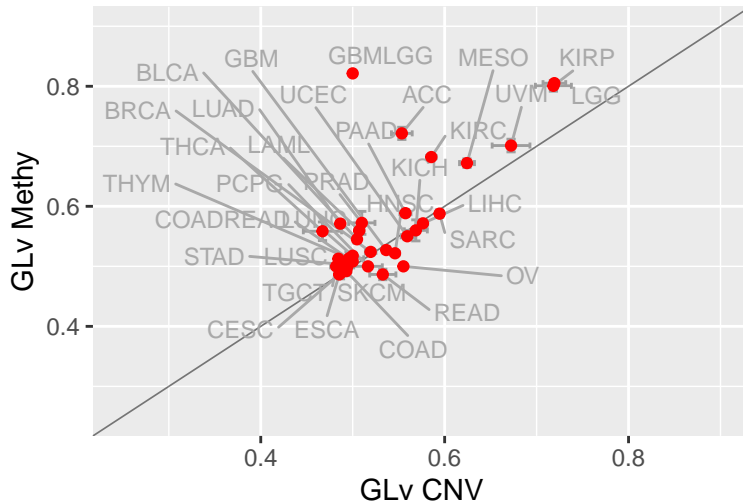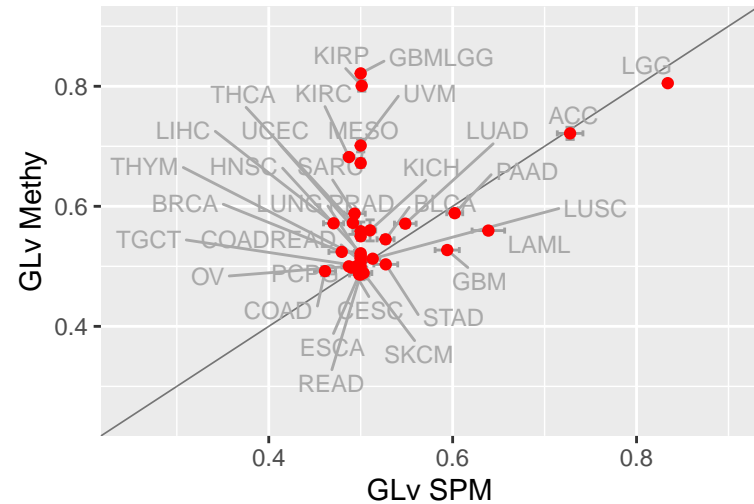

**Figure S7 Heatmap of Fleiss Kappa statistics across cohorts and models.**

'PLv' represents 'pathway-level' and 'GLv' represents 'gene-level'. The cells in grey represent models that cannot converge and in this case, no predictors could be selected to predict prognosis.

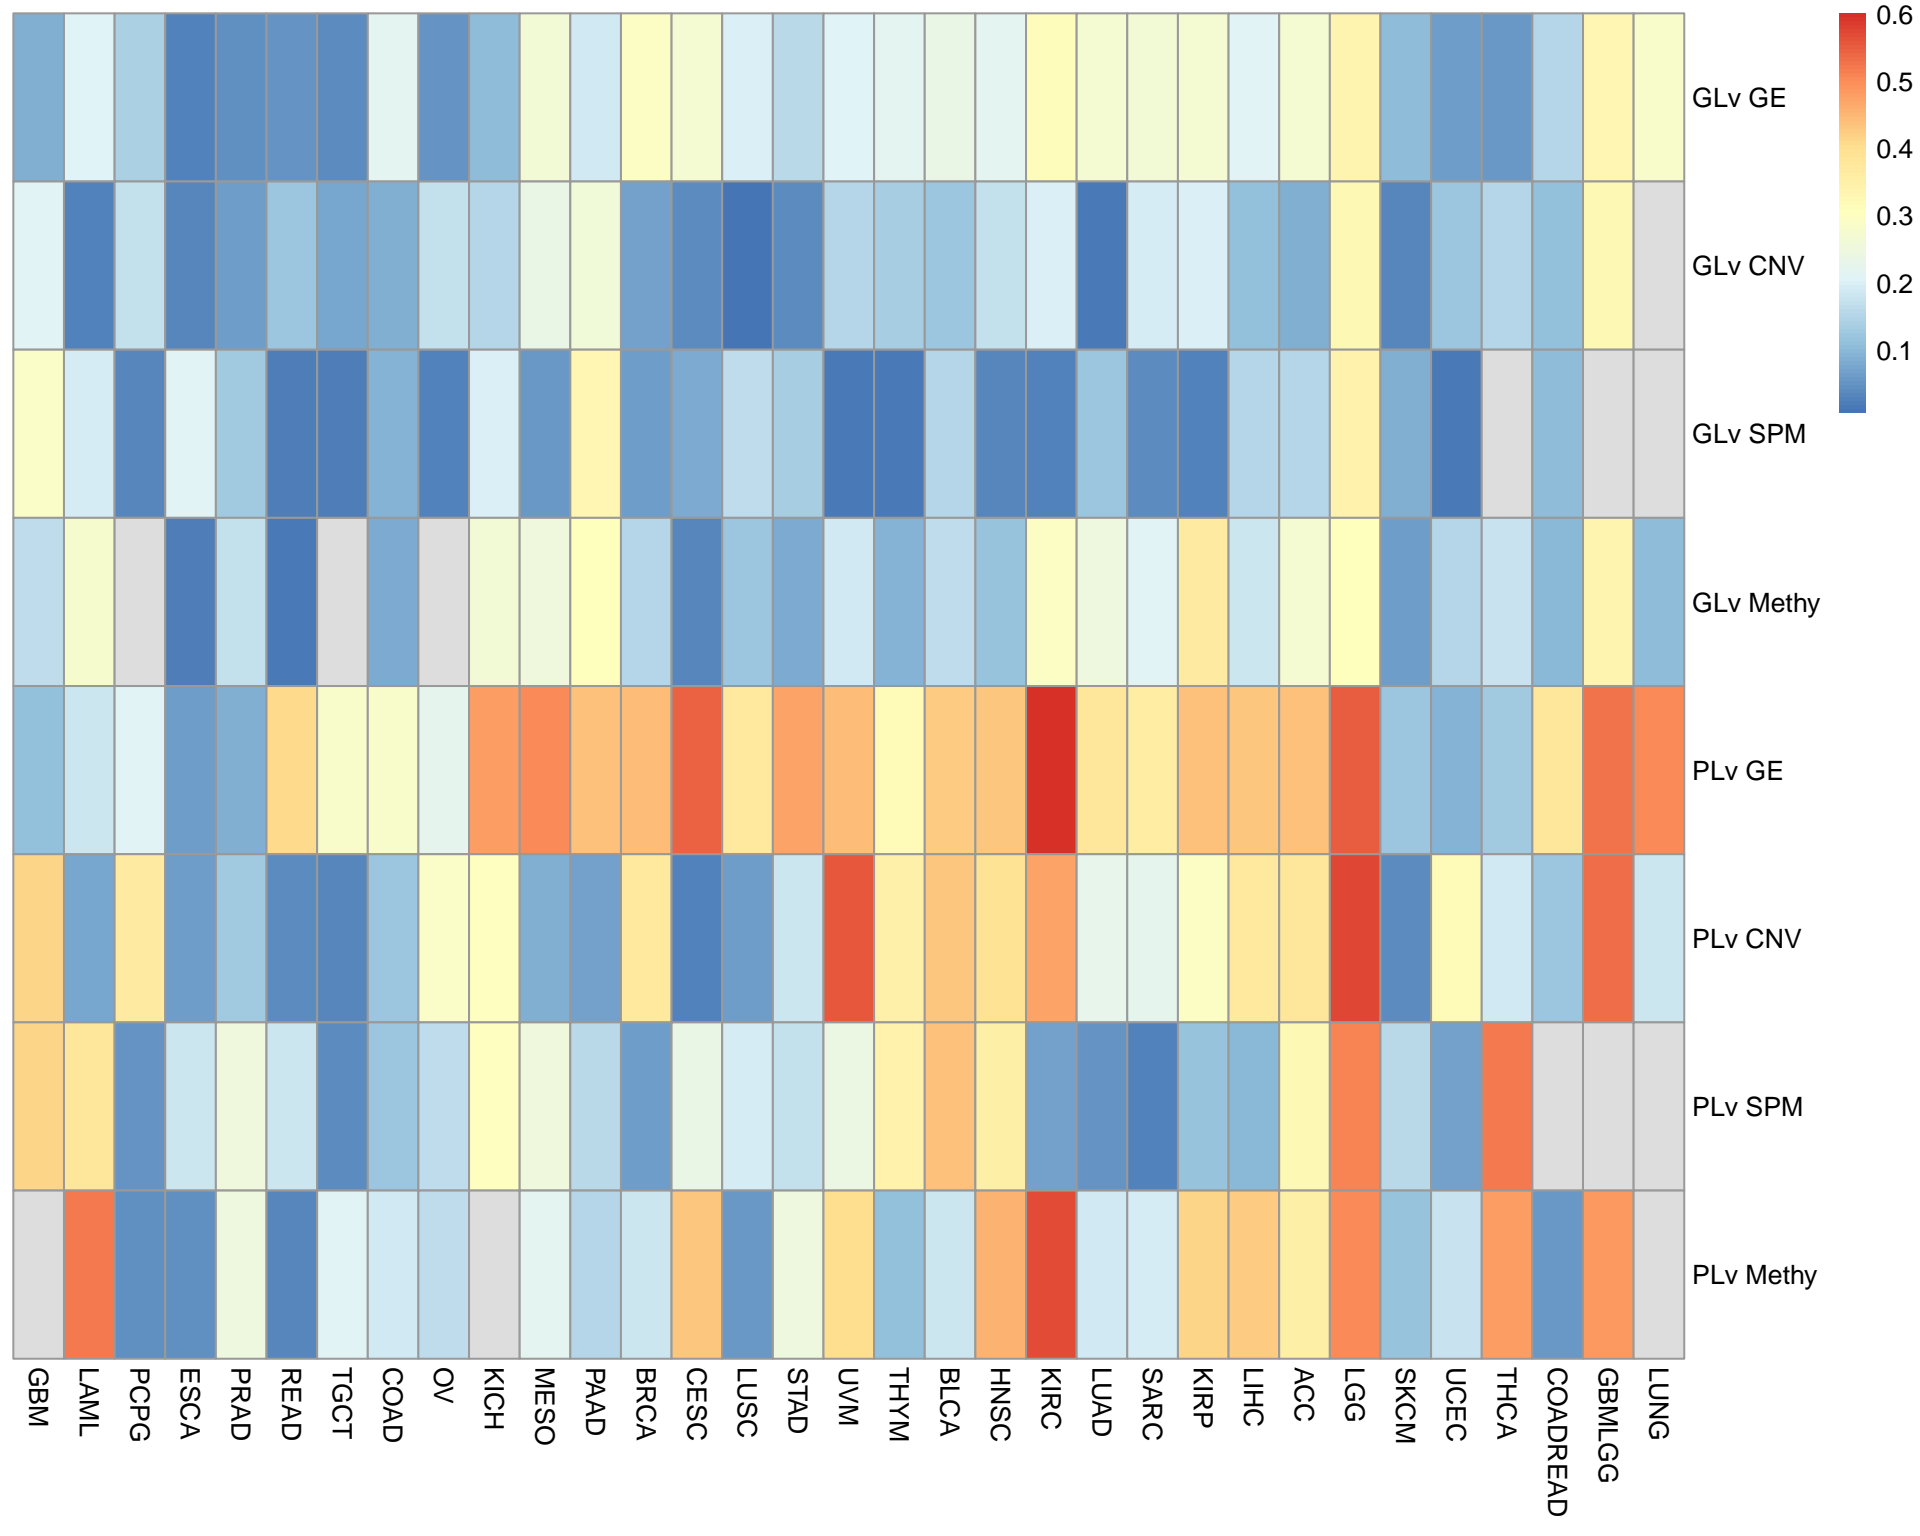

Supplement: MOESM1 [file 12885_2021_8796_MOESM1_ESM.pdf]
